# Supplementary material for: Thai Local Chicken Breeds, Chee Fah and Fah Luang, Originated from Chinese Black-Boned Chicken with Introgression of Red Junglefowl and Domestic Chicken Breeds
Source: MDPI journal article supplement (doi:10.3390/su15086878), 2023-04-19
Supplement: s1 [file s1]

## ***Supplementary Material***

### 1 Supplementary Data

#### 1.1 Supplementary Data S1

##### Materials and Methods

##### *Study area*

Chiang Rai is Thailand's northernmost province and forms part of the Golden Triangle region bordering Laos and Myanmar (19° 00'–20° 30' N, 99° 15'–100° 45' E). Occurrence data of the Chee Fah and Fah Luang chickens were collected from smallholder poultry and backyard chicken farms and analyzed to construct a land suitability model. Sampling occurrence data covered 18 villages in three districts, Mae Fa Luang (20° 16' 2" N 99° 48' 5" E), Wiang Kaen (20° 6' 44" N, 100° 30' 49" E), and Wiang Chiang Rung (20° 0' 47" N 100° 3' 25" E). In the study area, Chee Fah and Fah Luang chickens (Figure S1) are raised for poultry production by local communities rather than for sociocultural reasons (Figure S2). Fishnet polygons of 30 m<sup>2</sup> were created within the boundaries of 18 villages for predictive modeling of the Chee Fah and Fah Luang chickens, with a random sample point of 30% from the total polygons using ArcGIS 10.4.1 [1].

##### *Environmental data*

The environmental variables that affected the Chee Fah and Fah Luang chickens were elevation, distance to water, normalized difference vegetation index (NDVI), tree canopy cover, and forest canopy height. Elevation data at 30 m resolution were obtained from the Department of National Parks, Wildlife and Plant Conservation of Thailand, Ministry of Natural Resources and Environment (Figure S3a). The distance to water was calculated as the Euclidean distance between the main rivers (Figure S3b). Data for the inland water layers were obtained from the Land Development Department of the Ministry of Agriculture and Cooperatives, Thailand. The NDVI estimated vegetation activity, measured by Landsat 8 satellite images from January to March 2022, was provided by the U.S. Geological Survey from the Earth Explorer website (Figure S3c). Tree canopy cover, representing the estimated maximum tree canopy cover per pixel at 1–100% for 2010 in integer values (1–100), was obtained from Global Land Analysis and Discovery [2] (Figure S3d). Global Landsat analysis-ready data were used to extrapolate the Global Ecosystem Dynamics Investigation footprint-level forest canopy height measurements [3] (Figure S3e), and ArcGIS was used to interpolate the environmental factors at the same spatial resolution of 30 m in raster format.

### *Species distribution modeling*

The MaxEnt algorithm was used with the available software package, MaxEnt ver. 3.4.4, to perform breed distribution modeling of the Chee Fah and Fah Luang chickens [4,5]. MaxEnt combines environmental predictors and location data as inputs [6] and uses location-only data as appropriate for breed with small locations [7–9]. We selected the logistic output with suitability data ranging from 0 to 1, representing the occurrence probability of the Chee Fah and Fah Luang chickens, with default settings for the convergence threshold and maximum number of iterations (500) (Phillips and Dudík, 2008). Regularization data were selected automatically using MaxEnt software to reduce model overfitting [8]. The optimal MaxEnt model was selected using the 10th percentile presence probability and a 10-fold cross-validation method was used to generate a binary map. Response curves of the predictor variables were developed, and Jackknife importance was tested in the final optimal model [10]. To decrease the predictive uncertainty, we used the ensemble forecasting approach following Araújo and New [11] and applied the basic mathematical function of mean ensembles to calculate the final logistic outputs [12]. Model validation and predictive performance were used to evaluate the area under the curve (AUC) of receiver operating characteristics [13]. AUC data were threshold-independent measures of model accuracy that illustrated discrimination ability [13], where an AUC value of 0 indicated a model with no better discrimination than chance, an AUC value of 1 indicated perfect discrimination, and an AUC value greater than 0.8 indicated excellent discrimination. Averaged prediction maps of the final depicted presence probability of the breed were produced, with continuous values ranging from 0 to 1. This presence probability was classified into five equal-sized categorical (SC) classes following Li et al. [14]: SC-5 = very high suitability ( $p > 0.8$ ), SC-4 = high suitability ( $0.6 > p \leq 0.8$ ), SC-3 = moderate suitability ( $0.4 > p \leq 0.6$ ), SC-2 = least suitability ( $0.2 \geq p \leq 0.4$ ), and SC-1 = no suitability ( $p < 0.2$ ). Finally, the area under each of the classified categories was calculated using map algebra in ArcGIS.

### *Comparison of environmental factors between local chicken farms in Mae Hong Son and Chiang Rai Provinces*

Data from 466 Chee Fah and Fah Luang chicken farms in Mae Hong Son and 918 in Chiang Rai were selected for the study (Figure S4a–S4f). The elevation of Mae Hong Son ranged between 234–2,005 m and Chiang Rai ranged between 26–2,007 m, with detailed characteristics of the selected sites shown in Figure S4a and S4d. Annual mean temperature

(°C) and annual precipitation (mm) data (averaged for the year 1950–2000) from WorldClim2 [15] are shown in Figure S4b, S4e, S4c, and S4f. The elevation, annual mean temperature, and annual precipitation of local chicken farms in Mae Hong Son and Chiang Rai were extracted and processed using ArcGIS extract values for the point function. Datasets of elevation, annual mean temperature, and annual precipitation were compared between Mae Hong Son and Chiang Rai using paired *t*-tests.

#### *Mitochondrial DNA D-loop sequence analysis*

Multiple sequence alignments were performed for 39 sequences in the mitochondrial DNA (mtDNA) D-loop dataset of the Chee Fah and Fah Luang chickens using the default parameters of the Molecular Evolutionary Genetics Analysis 11 (MEGA11) software [16]. Ambiguous sites, sequences containing gaps and sequence primers were carefully discarded from the dataset. Estimates of the haplotype (*h*) and nucleotide ( $\pi$ ) diversity, number of haplotypes (*H*), the estimator theta (*S*), overall haplotype and average number of nucleotide differences (*k*) were calculated using DnaSP version 6.12.03 [17]. To investigate haplotype grouping and population dynamics, a statistical parsimony network from consensus sequences was built in PopART version 1.7 based on the Templeton, Crandall and Sing (TCS) algorithm [18]. Arlequin version 3.5.2.2 was used to calculate the genetic differentiation coefficient (*G<sub>ST</sub>*), Wright's *F* statistic for subpopulations within the total population (*F<sub>ST</sub>*) and  $\Phi_{ST}$  values from sequence and haplotype data [19]. The *F<sub>ST</sub>* (based on differences in haplotype frequencies) and  $\Phi_{ST}$  (the relationship between haplotypes based on molecular genetic distance) values were calculated between populations using 1,000 permutations [20,21]. DnaSP version 6.12.03 was used to examine the average number of nucleotide substitutions for each site between populations (*D<sub>xy</sub>*) and the net nucleotide substitutions for each site between populations (*D<sub>a</sub>*).

MtDNA D-loop sequences from this study were combined with data of the Chee Fah and Fah Luang chickens, data derived from the reference dataset of the Siam Chicken Bioresource Project [22,23, Wongloet et al., submitted data] and additional sequences deposited in the National Center for Biotechnology Information (NCBI) database (<https://www.ncbi.nlm.nih.gov/>). In total, 978 (496 sequences from the reference dataset of the Siam Chicken Bioresource Project, 443 sequences from the NCBI database and 39 sequences from this study) mtDNA D-loop sequences were aligned and prepared as mentioned above.

The dataset was trimmed to 398 bp to construct phylogenetic relationships and pairwise distances between the Chee Fah and Fah Luang chickens, red junglefowl and other domestic chicken breeds. The best fit nucleotide substitution model was estimated using ModelFinder [24] and a phylogenetic tree was reconstructed based on maximum likelihood, with ultrafast 10,000 bootstrap replicates [25] implemented in IQ-TREE v1.6.12 [26] and visualized using Interactive Tree of Life (iTOL) v5 online (<https://itol.embl.de/>, [27]). Genetic pairwise distances between the Chee Fah and Fah Luang chickens and other breeds were calculated using the default parameters for between-group genetic distance calculations implemented in MEGA11 software [16].

*Analysis of genetic diversity and population structure of Chee Fah and Fah Luang chickens based on microsatellite DNA markers*

Genetic diversity and population structure analyses based on microsatellite markers were previously described [22,23]. Genetic diversity parameters including allelic frequency, number of alleles ( $N_a$ ), number of effective alleles ( $N_{ea}$ ), observed heterozygosity ( $H_o$ ), expected heterozygosity ( $H_e$ ), linkage equilibrium and Wright's F-statistic for subpopulations within the total population ( $F_{ST}$ ) were calculated using Arlequin version 3.5.2.2 [19]. To account for limited population size, deviations from the Hardy-Weinberg equilibrium were assessed at each locus by implementing the Markov chain Monte Carlo (MCMC) approximation of Fisher's exact test in the "genepop" function in the package "stats" of R version 4.1.2 [28–30]. Significant differences and equal variances of  $H_o$  and  $H_e$  between the Chee Fah and Fah Luang populations were assessed by Welch's t-test (unequal variance between samples) using the "t.test" function and Bartlett's homogeneity of variance test using the "bartlett.test" function in "stats" of R version 4.1.2 [30,31]. FSTAT version 2.9.4 was used to calculate allelic richness ( $AR$ ) [32]. The MicroChecker program was used to locate null allelic markers [33] and Excel Microsatellite Toolkit add-ins were utilized to determine the polymorphic information content ( $PIC$ ) for each locus [34]. For each locus within populations, Shannon's information index ( $I$ ) and fixation index ( $F$ ) were determined using GenAlEx version 6.5 [35]. To account for the possibility of sibling-sibling or parent-offspring pairs within populations, the Chee Fah and Fah Luang chickens were assessed by relatedness values ( $r$ ) by calculating relatedness between all female-female, male-male and male-female pairs based on population allelic frequencies using GenAlEx version 6.5 [35]. The LynchRt estimator [36], as implemented in the program COANCESTRY [37], was used to calculate

individual and overall  $F_{IS}$  with 95% confidence intervals. Both estimations ( $r$  values and  $F_{IS}$ ) assumed that average values did not differ significantly from random assortments of unrelated individuals.

The infinite allele model (IAM) based on corrected  $p$ -values of  $F_{ST}$ , as implemented in Arlequin version 3.5.2.2. and the stepwise mutation model (SMM) using  $R_{ST}$  in FSTAT version 2.9.3 [32] were determined to assess pairwise genetic distances among the population. To account for null alleles on the estimation of genetic differentiation, ENA (excluding null alleles) corrections using the FreeNA program [38] were implemented to obtain pairwise  $F_{ST}$  ENA values.

To elucidate the group structure, an analysis of molecular variance (AMOVA) was performed using Arlequin 3.5.2.2. Unlike  $F_{ST}$ , this algorithm identifies subgroup hierarchical structure and does not require a priori assumption of the Hardy-Weinberg equilibrium. Nei's genetic distances between groups were then examined using GenAlEx version 6.5 [39]. Principal coordinate analysis (PCoA) was performed using GenAlEx version 6.5 [35] to assess the overall relationship among individuals in the population. Analysis of principal components (DAPC) was performed using the package ADEGENET 2.0 [40] in R 4.1.2 [30]. DAPC makes no assumptions about population models [40] and defines synthetic variables where genetic variation is maximized between clusters of individuals ( $K$ ) and minimized within clusters. The model-based clustering method implemented in STRUCTURE version 2.3.4 was used to determine population structure [41]. The run length was set to 100,000 MCMC replicates after a burn-in period of 100,000 generations using correlated allelic frequencies under a straight admixture model. The number of clusters ( $K$ ) varied from 1 to 25, with 25 replicates for each value of  $K$ . The most probable number of bunches was dictated by plotting the log likelihood of the information ( $\ln \Pr (X|K)$ ) [41] over the scope of tested  $K$  esteems before choosing the  $K$  esteem value at which  $\ln \Pr (X|K)$  settled. The  $\Delta K$  strategy was also applied using Structure Harvester [42]. To investigate the possibility of selective sweep within the two populations of the Chee Fah and Fah Luang chickens, the individuals/population expected heterozygosity ( $H_e$ ), observed heterozygosity ( $H_o$ ) and inbreeding coefficient ( $F_{IS}$ ) values based on genotype data were plotted for each microsatellite locus (28 loci in total). The sweep or purifying selection signature is reflected by high  $F_{IS}$  and low  $H_e$ , whereas neutral or balanced selection is shown by low  $F_{IS}$  and high  $H_e$ .

To investigate the origin of the Chee Fah and Fah Luang chickens, we performed PCoA, DAPC and model-based clustering methods based on  $\Delta K$  value using genotypic data of red

junglefowl and Thai domestic chicken breeds/ecotypes retrieved from “The Siam Chicken Bioresource Project” together with the data of the Chee Fah and Fah Luang chickens [22,23] as mentioned above. To date a possibility of selective sweep of the Chee Fah and Fah Luang, red junglefowl and other domestic chickens within the Siam Chicken Bioresource Project, the same methods were performed as mentioned previously.

## References

1. Morehouse, S.; The arc/info geographic information system. *Comput. Geosci.* **1992**, *18*, 435–441. doi: 10.1016/0098-3004(92)90073-Z.
2. Hansen, M.C.; Potapov, P.V.; Moore, R.; Hancher, M.; Turubanova, S.A.; Tyukavina, A.; Thau, D.; Stehman, S.V.; Goetz, S.J.; Loveland, T.R.; et al. High-resolution global maps of 21st-century forest cover change. *Science* **2013**, *342*, 850–853. doi: 10.1126/science.1239552.
3. Potapov, P.; Hansen, M.C.; Kommareddy, I.; Kommareddy, A.; Turubanova, S.; Pickens, A.; Adusei, B.; Tyukavina, A.; Ying, Q. Landsat analysis ready data for global land cover and land cover change mapping. *Remote Sens.* **2020**, *12*, 246. doi: 10.3390/rs12030426
4. Phillips, S.J.; Anderson, R.P.; Schapire, R.E. Maximum entropy modeling of species geographic distributions. *Ecol. Model.* **2006**, *190*, 231–259. doi: 10.1016/j.ecolmodel.2005.03.026.
5. Phillips, S.J.; Dudík, M. Modeling of species distributions with Maxent: new extensions and a comprehensive evaluation. *Ecography* **2008**, *31*, 161–175. doi: 10.1111/j.2007.0906-7590.05203.
6. Elith, J.; Phillips, S.J.; Hastie, T.; Dudík, M.; Chee, Y.E.; Yates, C.J. A statistical explanation of MaxEnt for ecologists. *Divers. Distrib.* **2011**, *17*, 43–57. doi: 10.1111/j.1472-4642.2010.00725.x.
7. Elith, J.; Graham, C.H.; Anderson, R.P.; Dudík, M.; Ferrier, S.; Guisan, A.; Hijmans, R.J.; Huettmann, F.; Leathwick, J.R.; Lehmann, A.; et al. Novel methods improve prediction of species’ distributions from occurrence data. *Ecography* **2006**, *29*, 129–151. doi: 10.1111/j.2006.0906-7590.04596.x.
8. Pearson, R.G.; Raxworthy, C.J.; Nakamura, M.; Peterson, A.T. Predicting species distributions from small numbers of occurrence records: a test case using cryptic geckos in Madagascar. *J. Biogeogr.* **2006**, *34*, 102–117. doi: 10.1111/j.1365-2699.2006.01594.x.

9. Wisz, M.S.; Hijmans, R.J.; Li, J.; Peterson, A.T.; Graham, C.H.; Guisan, A. Effects of sample size on the performance of species distribution models. *Divers. Distrib.* **2008**, *14*, 763–773. doi: 10.1111/j.1472-4642.2008.00482.x.
10. Baldwin, R.A. Use of maximum entropy modeling in wildlife research. *Entropy* **2009**, *11*, 854–866. doi: 10.3390/e11040854.
11. Araujo, M.B.; New, M. Ensemble forecasting of species distributions. *Trends Ecol. Evol.* **2007**, *22*, 42–47. doi: 10.1016/j.tree.2006.09.010.
12. Marmion, M.; Parviainen, M.; Luoto, M.; Heikkinen, R.K.; Thuiller, W. Evaluation of consensus methods in predictive species distribution modelling. *Divers. Distrib.* **2009**, *15*, 59–69. doi: 10.1111/j.1472-4642.2008.00491.x.
13. Fielding, A.H.; Bell, J.F. A review of methods for the assessment of prediction errors in conservation presence/absence models. *Environ. Conserv.* **1997**, *24*, 38–49. doi: 10.1017/S0376892997000088.
14. Li, C.; Wang, J.; Wang, L.; Hu, L.; Gong, P. Comparison of classification algorithms and training sample sizes in urban land classification with Landsat thematic mapper imagery. *Remote Sens.* **2014**, *6*, 964–983. doi: 10.3390/rs6020964.
15. Fick, S.E.; Hijmans, R.J. WorldClim 2: new 1-km spatial resolution climate surfaces for global land areas. *Int. J. Climatol.* **2017**, *37*, 4302–4315. doi: 10.1002/joc.5086.
16. Tamura, K.; Stecher, G.; Kumar, S. Molecular evolutionary genetics analysis version 11. *Mol. Biol. Evol.* **2021**, *38*, 3022–302. doi: 10.1093/molbev/msab120.
17. Rozas, J.; Ferrer-Mata, A.; Sanchez-DelBarrio, J.C.; Guirao-Rico, S.; Librado, P.; Ramos-Onsins, S.E.; Sanchez-Gracia, A. DnaSP 6: DNA sequence polymorphism analysis of large data sets. *Mol. Biol. Evol.* **2017**, *34*, 3299–3302. doi: 10.1093/molbev/msx248.
18. Clement, M.; Snell, Q.; Walker, P.; Posada, D.; Crandall, K. TCS: estimating gene genealogies. 16<sup>th</sup> International Parallel and Distributed Processing Symposium (IPDPS 2002), Fort Lauderdale, FL, USA, 15-19 April 2002.
19. Excoffier, L.; Lischer, H.E. Arlequin suite ver 3.5: a new series of programs to perform population genetics analyses under Linux and Windows. *Mol. Ecol. Resour.* **2010**, *10*, 564–567. doi: 10.1111/j.1755-0998.2010.02847.x.
20. Weir, B.S.; Cockerham, C.C. Estimating F-statistics for the analysis of population structure. *Evolution* **1984**, *38*, 1358–1370. doi: 10.2307/2408641.
21. Excoffier, L.; Smouse, P.E.; Quattro, J. Analysis of molecular variance inferred from metric distances among DNA haplotypes: application to human mitochondrial DNA restriction data. *Genetics* **1992**, *131*, 479–491. doi: 10.1093/genetics/131.2.479.

22. Hata, A.; Nunome, M.; Suwanasopee, T.; Duengkae, P.; Chaiwatana, S.; Chamchumroon, W.; Suzuki, T.; Koonawootrittriron, S.; Matsuda, Y.; Srikulnath, K. Origin and evolutionary history of domestic chickens inferred from a large population study of Thai red junglefowl and indigenous chickens. *Sci. Rep.* **2021**, *11*, 2035. doi: 10.1038/s41598-021-81589-7.
23. Singchat, W.; Chaiyes, A.; Wongloet, W.; Ariyaraphong, N.; Jaisamut, K.; Panthum, T.; Ahmad, S.F.; Chaleekarn, W.; Suksavate, W.; Inpota, M.; et al. Red junglefowl resource management guide: Bioresource reintroduction for sustainable food security in Thailand. *Sustainability* **2022**, *14*, 7895. doi: 10.3390/su14137895.
24. Kalyaanamoorthy, S.; Minh, B.Q.; Wong, T.K.F.; von Haeseler, A.; Jermini, L.S. ModelFinder: fast model selection for accurate phylogenetic estimates. *Nat Methods*. **2017**, *14*, 587–589. doi: 10.1038/nmeth.4285.
25. Hoang, D.T.; Chernomor, O.; Von Haeseler, A.; Minh, B.Q.; Vinh, L.S. UFBoot2: Improving the ultrafast bootstrap approximation. *Mol. Biol. Evol.* **2017**, *35*, 518–522. doi: 10.1093/molbev/msx281.
26. Trifinopoulos, J.; Nguyen, L.T.; von Haeseler, A.; Minh, B.Q. W-IQ-TREE: a fast online phylogenetic tool for maximum likelihood analysis. *Nucleic. Acids. Res.* **2016**, *44*, W232–235. doi: 10.1093/nar/gkw256.
27. Letunik, I.; Bork, P. Interactive Tree Of Life (iTOL) v5: an online tool for phylogenetic tree display and annotation. *Nucleic Acids Res.* **2021**, *49*, W293–W296. doi: 10.1093/nar/gkab301.
28. Guo, S.W.; Thompson, E. A Monte Carlo method for combined segregation and linkage analysis. *Am. J. Hum. Genet.* **1992**, *51*, 1111–1126.
29. Raymond, M.; Rousset, F. An exact test for population differentiation. *Evolution* **1995**, *49*, 1280–1283.
30. R Core Team. R: A language and environment for statistical computing. R Foundation for Statistical Computing, Vienna, Austria, **2022**.
31. Welch, B.L. The generalization of 'STUDENT'S' problem when several different population variances are involved. *Biometrika* **1947**, *34*, 28–35. doi: 10.1093/biomet/34.1-2.28.
32. Goudet, J. FSTAT (version 1.2): a computer program to calculate F-statistics. *J. Hered.* **1995**, *86*, 485–486. doi: 10.1093/oxfordjournals.jhered.a111627.



33. Van Oosterhout, C.; Hutchinson, W.F.; Wills, D.P.; Shipley, P. MICRO-CHECKER: software for identifying and correcting genotyping errors in microsatellite data. *Mol. Ecol. Notes*. **2004**, *4*, 535–538. doi: 10.1111/j.1471-8286.2004.00684.x.
34. Park, S.D.E. The Excel microsatellite toolkit (version 3.1). Animal Genomics Laboratory, University College Dublin, Ireland, 2001.
35. Peakall, R.; Smouse, P.E. GenAlEx 6.5: genetic analysis in Excel. Population genetic software for teaching and research--an update. *Bioinformatics* **2012**, *28*, 2537–2539. doi: 10.1093/bioinformatics/bts460.
36. Lynch, M.; Ritland, K. Estimation of pairwise relatedness with molecular markers. *Genetics* **1999**, *152*, 1753–1766. doi: 10.1093/genetics/152.4.1753.
37. Wang, J. COANCESTRY: a program for simulating, estimating and analysing relatedness and inbreeding coefficients. *Mol. Ecol. Resour.* **2011**, *11*, 141–145. doi: 10.1111/j.1755-0998.2010.02885.x.
38. Chapuis, M.P.; Estoup, A. Microsatellite null alleles and estimation of population differentiation. *Mol. Biol. Evol.* **2007**, *24*, 621–631. doi: 10.1093/molbev/msl191.
39. Nei, M. Genetic distance between populations. *Am. Nat.* **1972**, *106*, 283–292.
40. Jombart, T. adegenet: a R package for the multivariate analysis of genetic markers. *Bioinformatics* **2008**, *24*, 1403–1405. doi: 10.1093/bioinformatics/btn129.
41. Pritchard, J.K.; Stephens, M.; Donnelly, P. Inference of population structure using multilocus genotype data. *Genetics* **2000**, *155*, 945–959. doi: 10.1093/genetics/155.2.945.
42. Earl, D.A.; von Holdt, B.M. STRUCTURE HARVESTER: a website and program for visualizing STRUCTURE output and implementing the Evanno method. *Conserv Genet Resour* **2011**, *4*, 359–361. doi: 10.1007/s12686-011-9548-7.

## 2 Supplementary Figures and Tables

### 2.1 Supplementary Figures

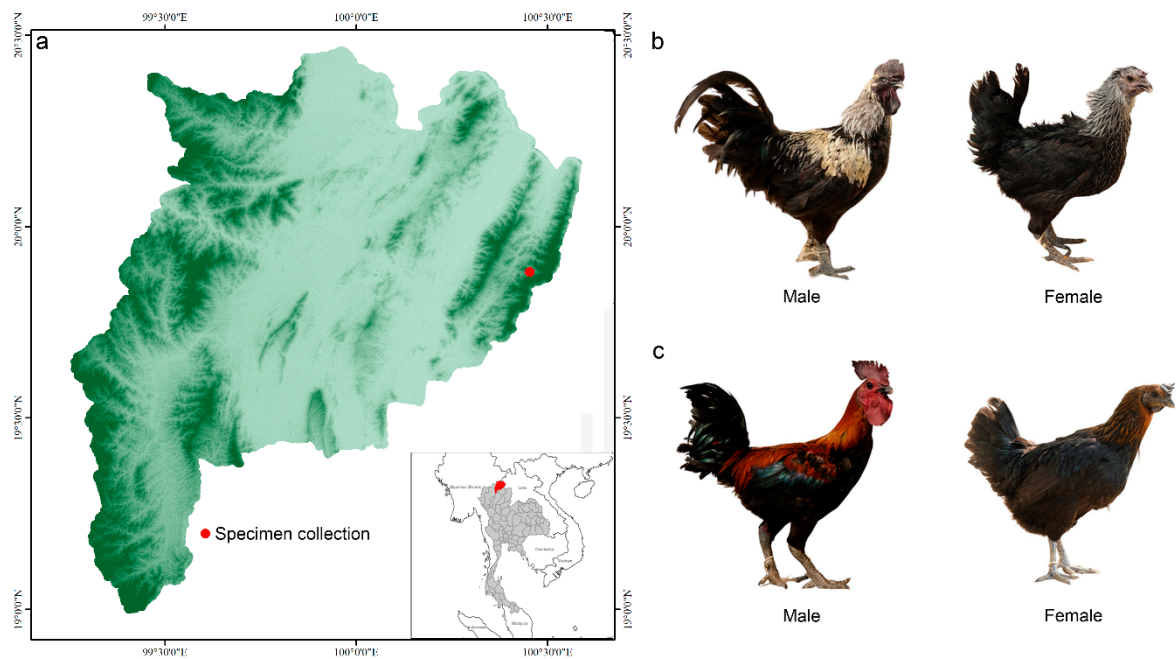

**Figure S1.** Specimen origin (a) and phenotypic characteristics of male and female Chee Fah (b) and Fah Luang (c) Northern Thailand domestic chicken breeds.

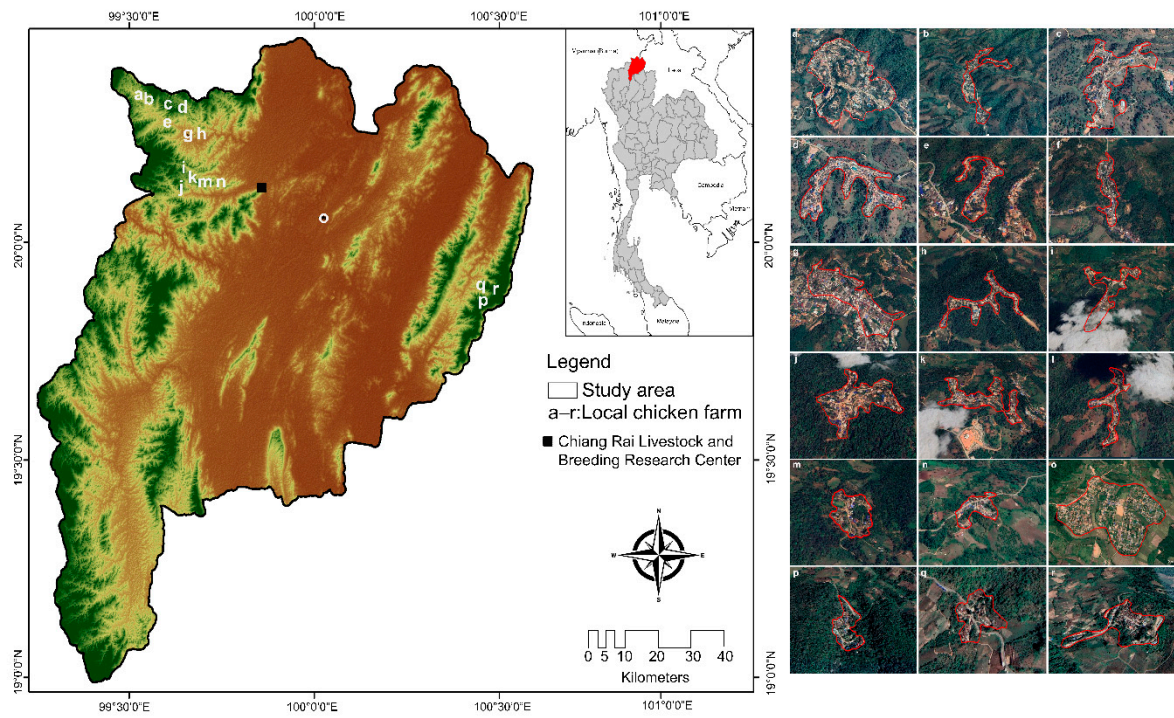

**Figure S2.** Study area and occurrence data of the Chee Fah and Fah Luang chickens.

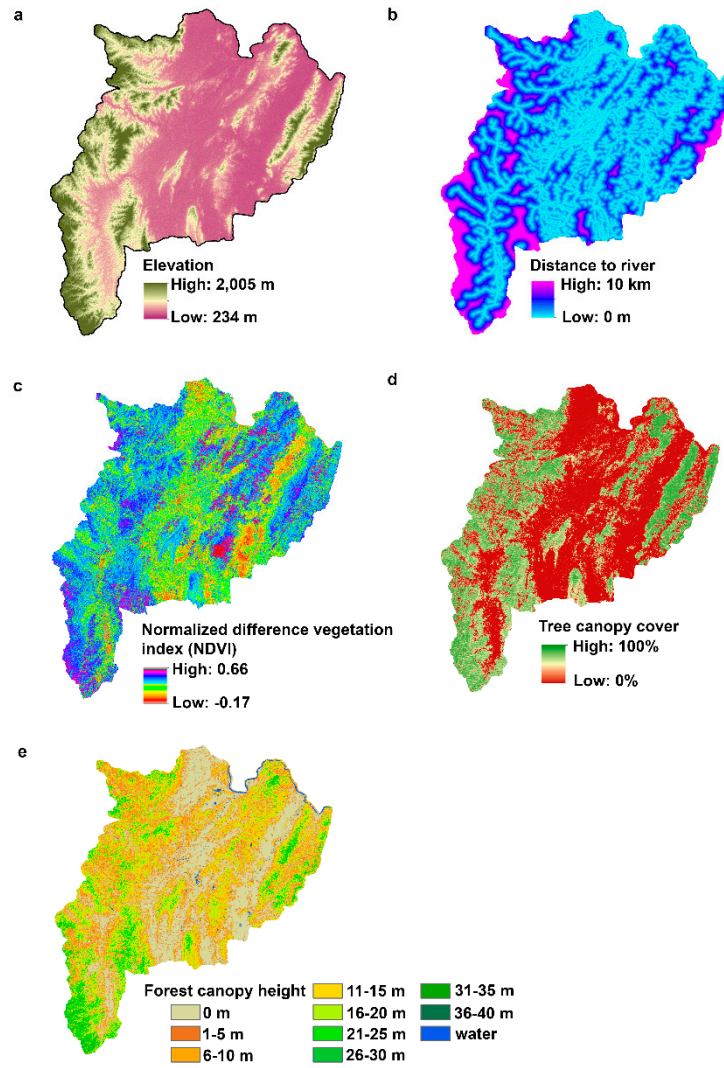

**Figure S3.** Environmental variables used to assess the species distribution model of the Chee Fah and Fah Luang chickens: (a) elevation, (b) distance to water, (c) normalized difference vegetation index (NDVI), (d) tree canopy cover and (e) forest canopy height.

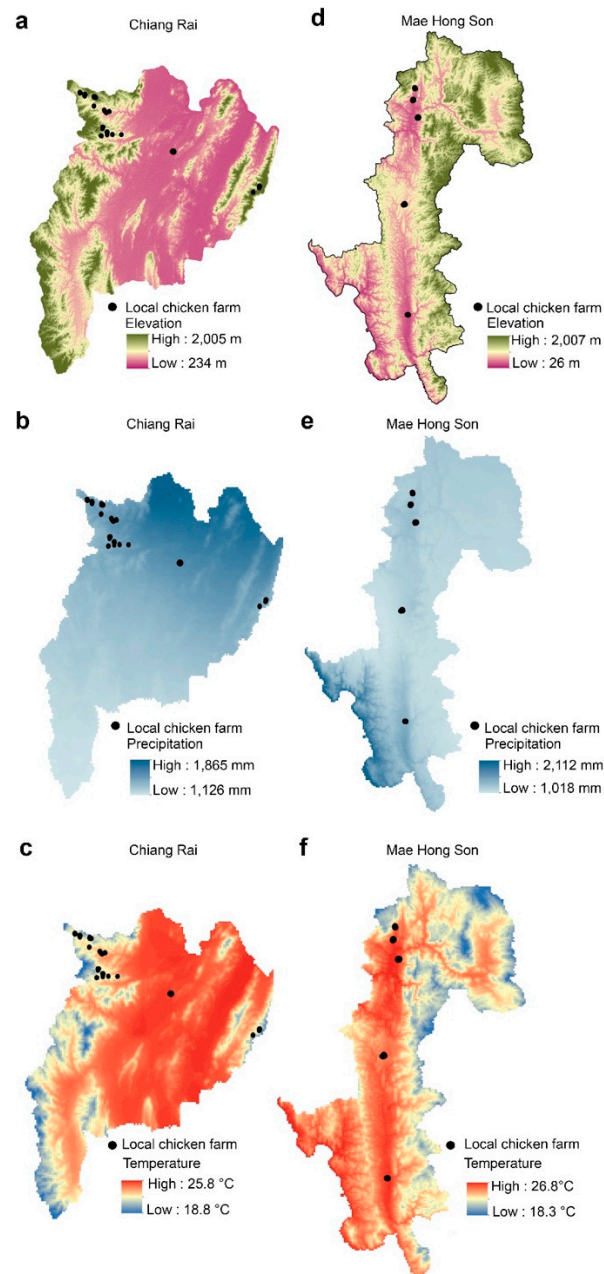

**Figure S4.** Elevation (a,d), annual mean temperature (b,e) and annual precipitation (c,f) map with 466 local chicken farm stations from Mae Hong Son province and 918 local chicken farm stations from Chiang Rai province.

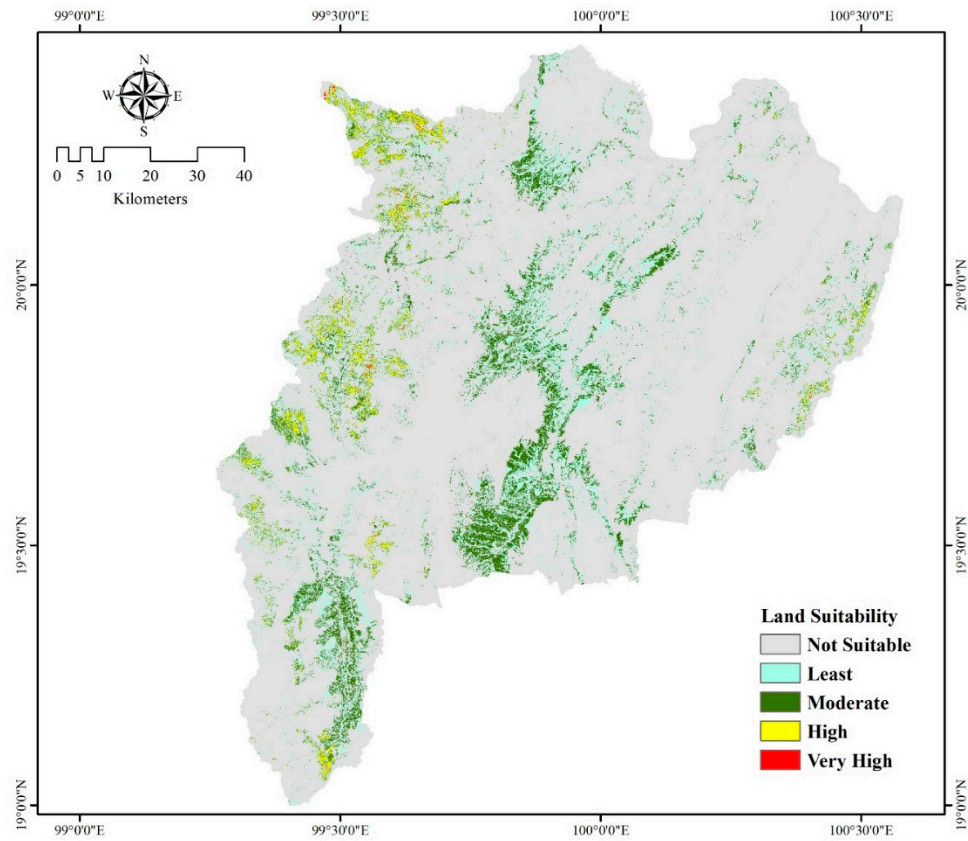

**Figure S5.** Potential land suitability modeling of the Chee Fah and Fah Luang chickens in Thailand.



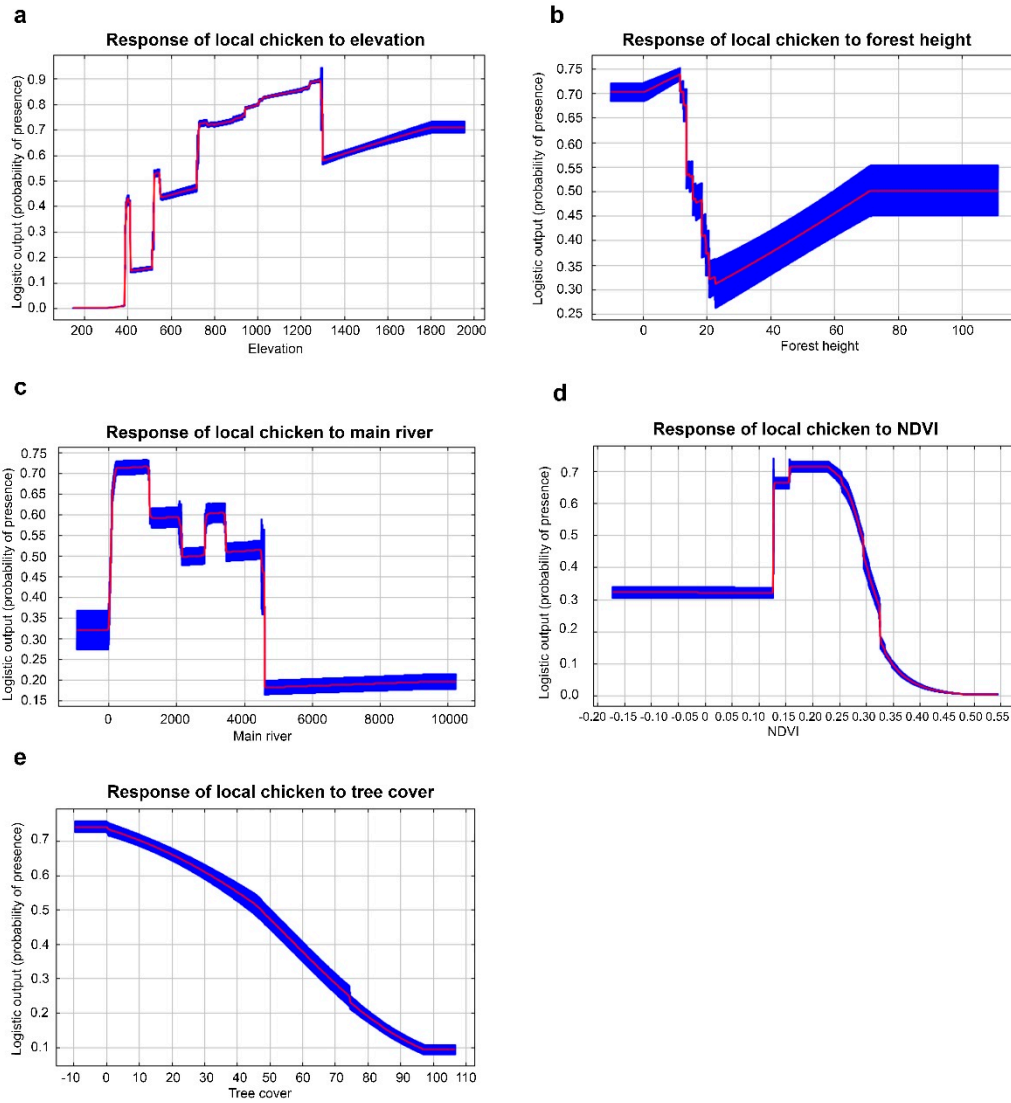

**Figure S6.** Maximum entropy modeling response area curves of the predictor variables influencing the Chee Fah and Fah Luang chicken distribution: (a) elevation, (b) forest canopy height, (c) main river, (d) normalized difference vegetation index (NDVI) and (e) tree cover.

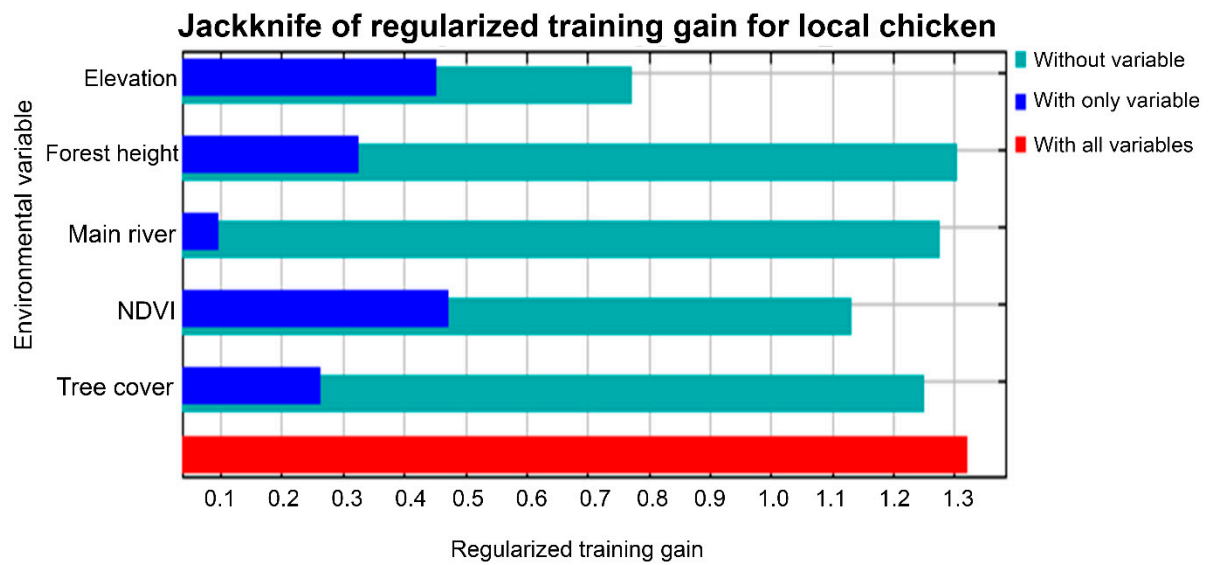

**Figure S7.** The Jackknife method used in maximum entropy modeling and environmental factors affecting the potential distribution of the Chee Fah and Fah Luang chickens.



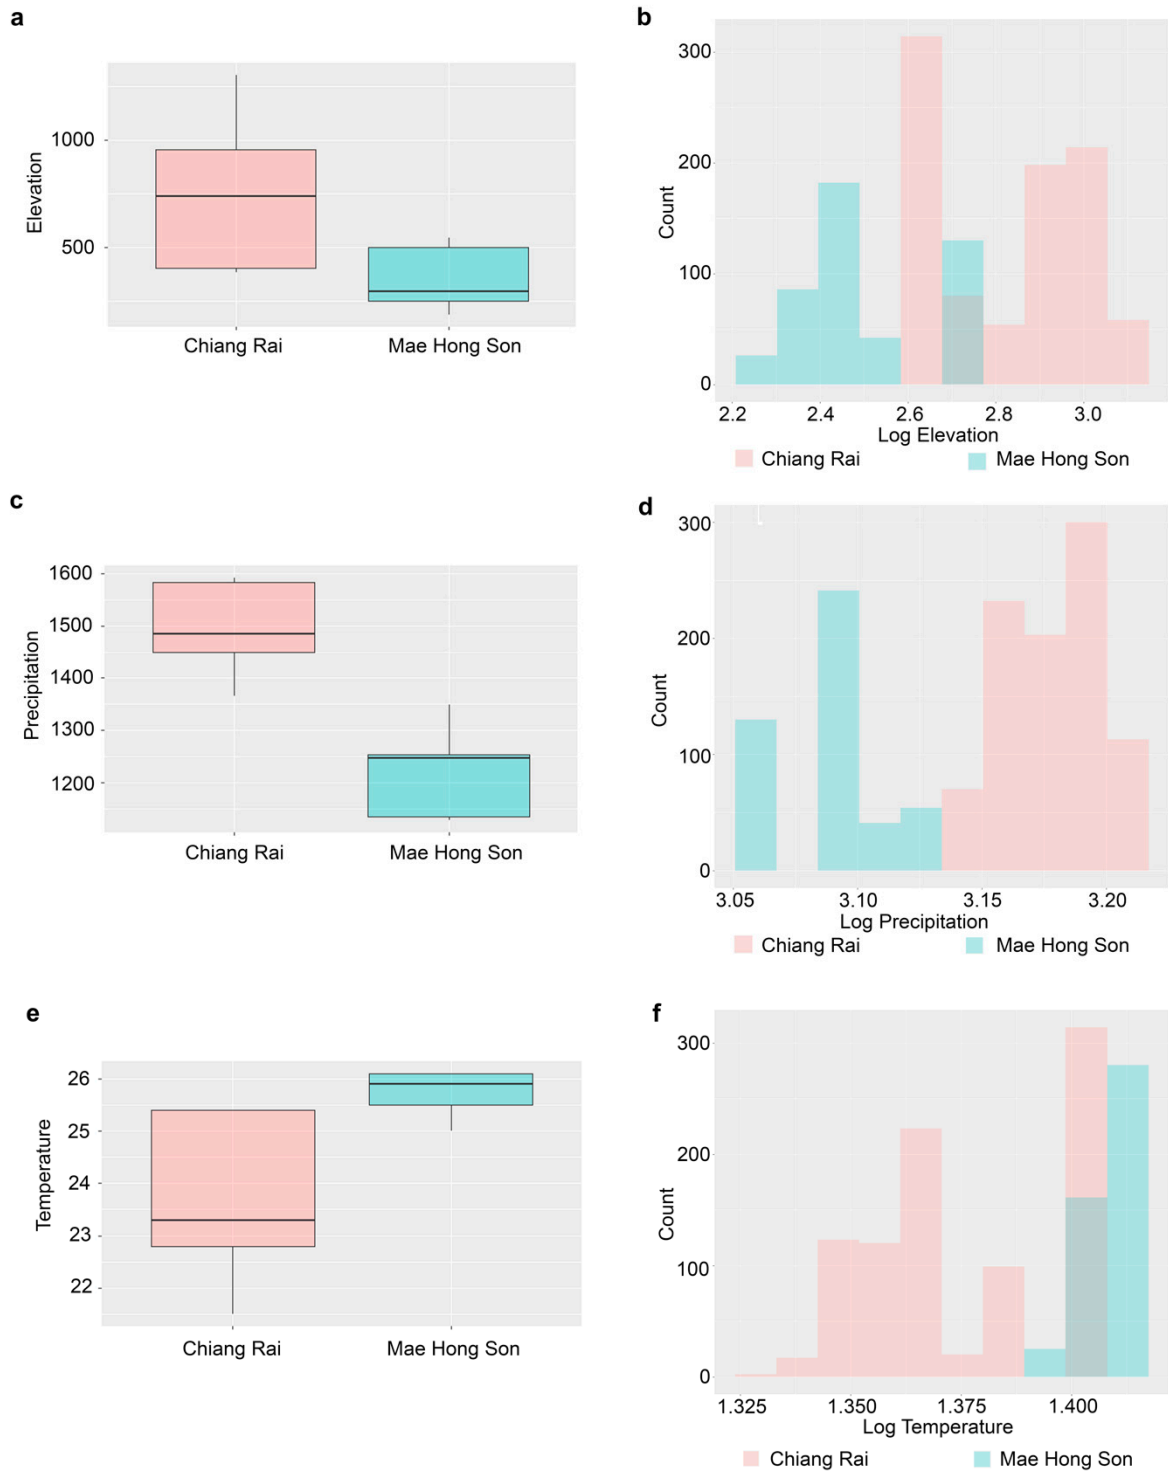

**Figure S8.** Environmental factor characteristics including (a) mean and (b) histogram of elevation, (c) mean and (d) histogram of annual precipitation and (e) mean and (f) histogram of annual temperature compared between Chiang Rai and Mae Hong Son provinces.

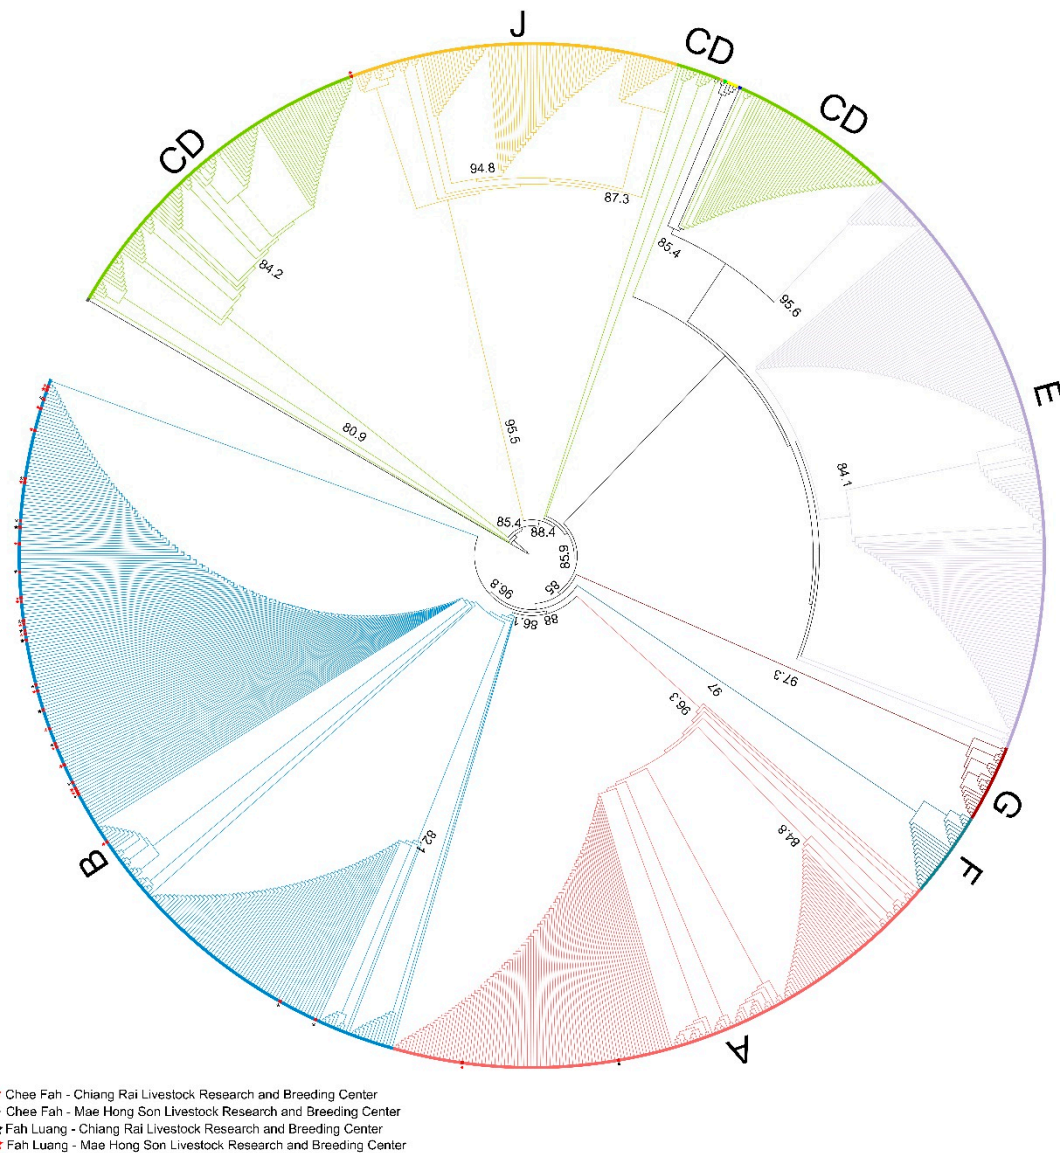

**Figure S9.** Phylogenetic relationships between Chee Fah and Fah Luang, domestic breeds and red junglefowl based on the maximum likelihood approach with 10,000 ultrafast bootstrap replicates. The red dot represents samples from this study. The number above the node denote bootstrap value. The letter and color indicate assigned haplogroups. Haplogroups nomenclature are based on Miao et al. [1].

1. Miao, Y.W.; Peng, M.S.; Wu, G.S.; Ouyang, Y.N.; Yang, Z.Y.; Yu, N.; Liang, J.P.; Pianchou, G.; Beja-Pereira, A.; Mitra, B.; et al. Chicken domestication: an updated perspective based on mitochondrial genomes. *Heredity* **2013**, *110*, 277–282. doi: 10.1038/hdy.2012.83.

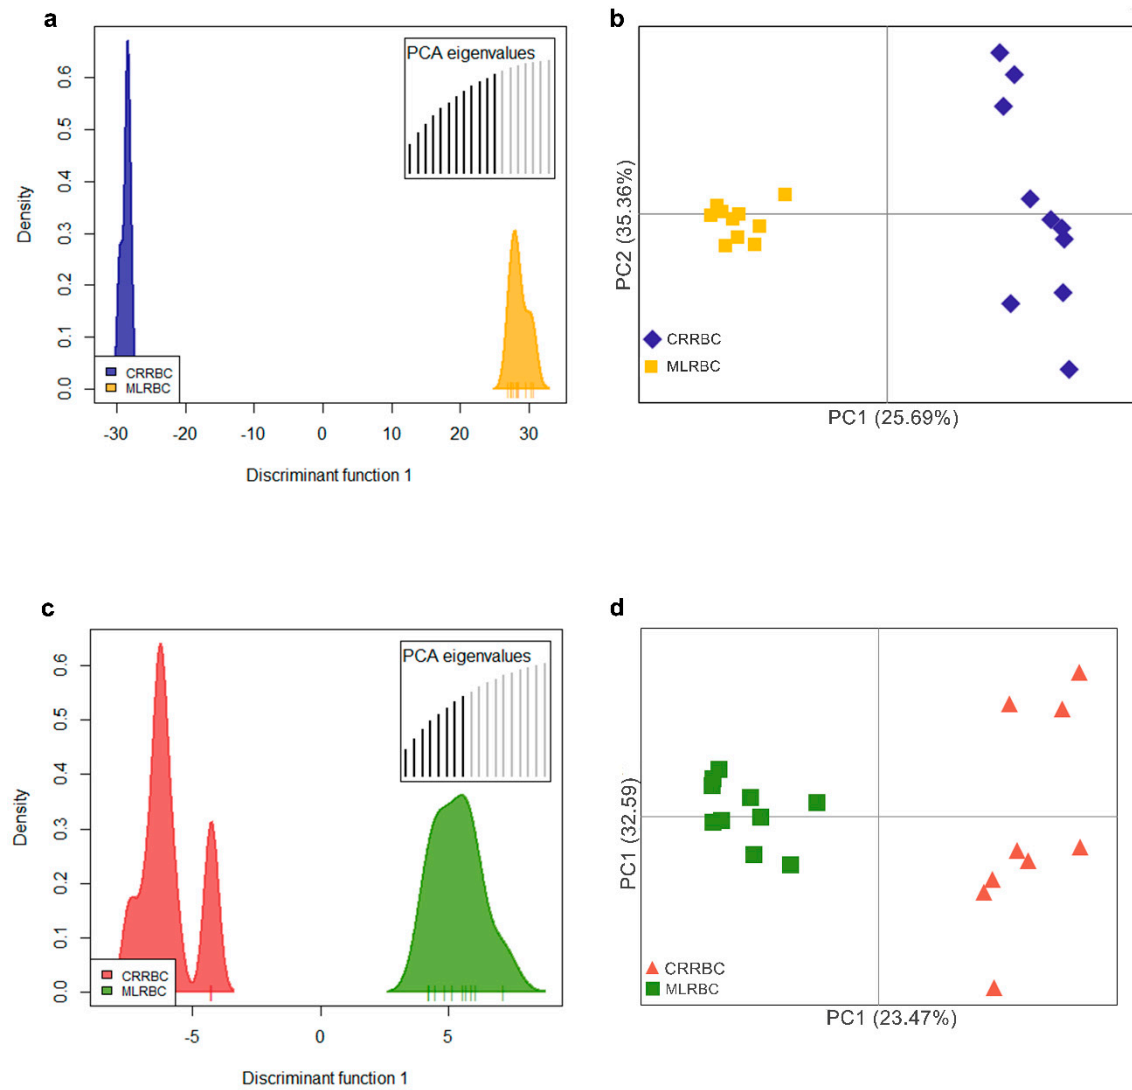

**Figure S10.** Discriminant Analysis of Principal Components (DAPC) and Principal Coordinate Analysis (PCoA) results of (a, b) Chee Fah and (c, d) Fah Luang breeds from two populations (Mae Hong Son Livestock Research and Breeding Center: MLRBC and Chiang Rai Livestock Research and Breeding Center: CRRBC). Assigned genetic clusters are represented by different colors while dots represent different individuals.

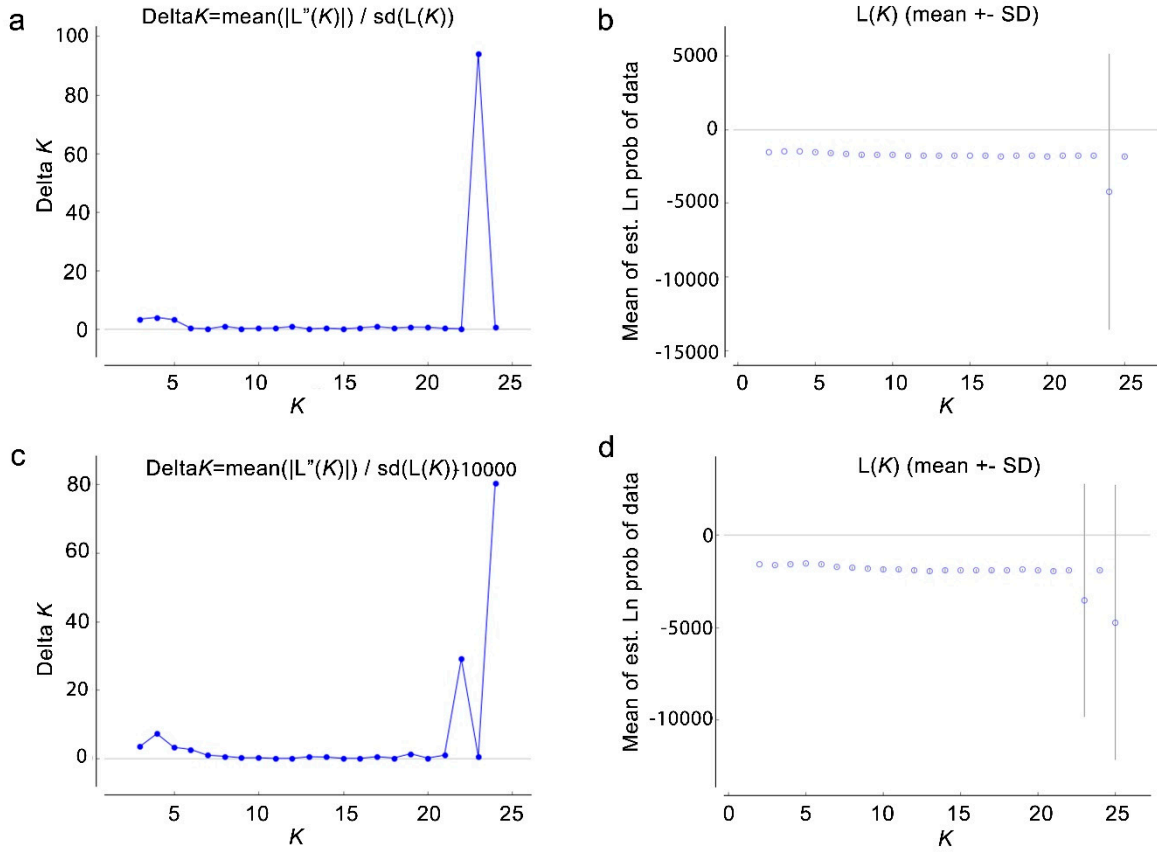

**Figure S11.** Different population structure patterns of the Chee Fah (n= 20) and Fah Luang chickens (n =19) generated by model-based Bayesian clustering algorithms implemented in STRUCTURE. (a) Plot of Evanno's  $\Delta K$  of Chee Fah chickens, (b) plot of Evanno's  $\Delta K$  of the Fah Luang chickens, (c) plot of  $\ln P(K)$  of the Chee Fah chickens, and (d) Plot of  $\ln P(K)$  of the Fah Luang chickens.

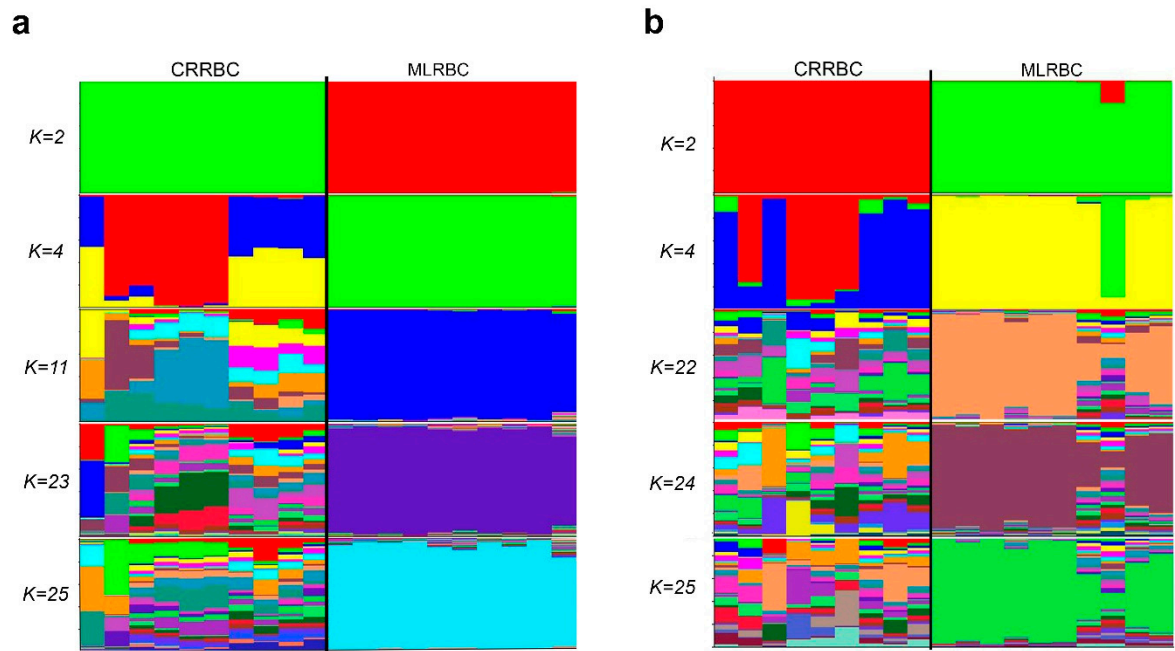

**Figure S12.** Population structure of (a) the Chee Fah (n=20) and (b) Fah Luang (n=19) chicken individuals from two populations (Mae Hong Son Livestock Research and Breeding Center: MLRBC and Chiang Rai Livestock Research and Breeding Center: CRRBC). Each vertical bar on the x-axis represents an individual, while the y-axis represents the proportion of membership (posterior probability) in each genetic cluster. Black vertical lines indicating the boundaries. Detailed information on all indigenous chicken individuals is presented in Table S1.

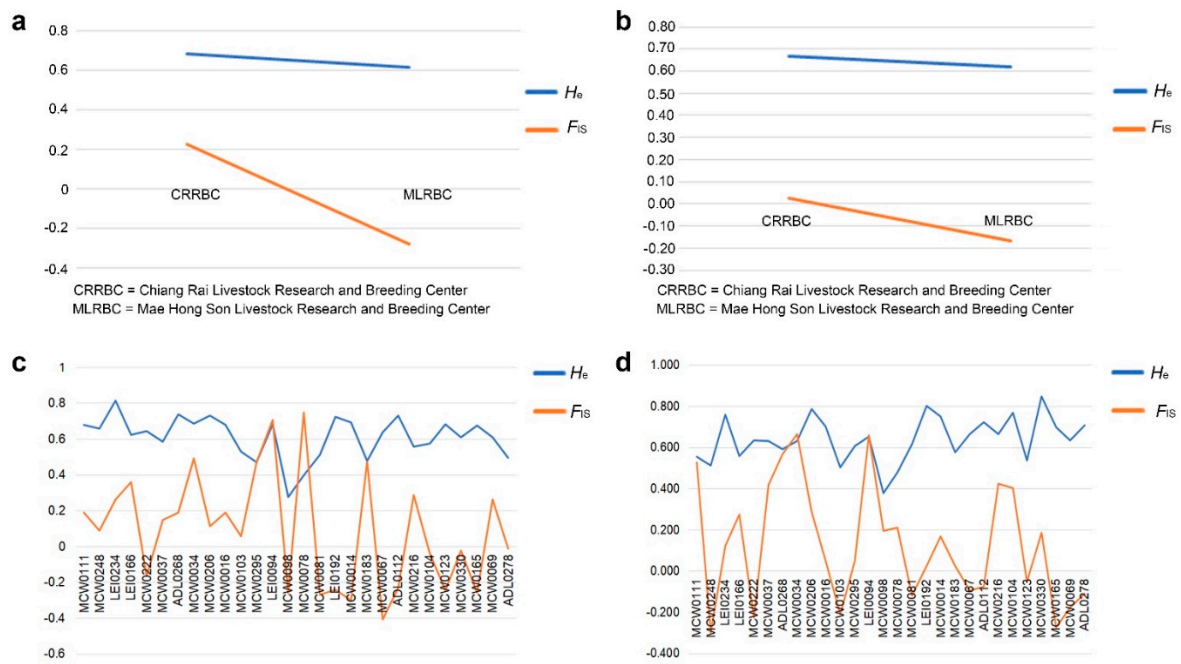

**Figure S13.** Mapping of expected heterozygosity ( $H_e$ ) against inbreeding coefficients ( $F_{IS}$ ) along the length of the physical map. (a) Chee Fah chicken populations, (b) Fah Luang chicken populations, (c) microsatellite loci of the Chee Fah chickens and (d) microsatellite loci of the Fah Luang chickens.

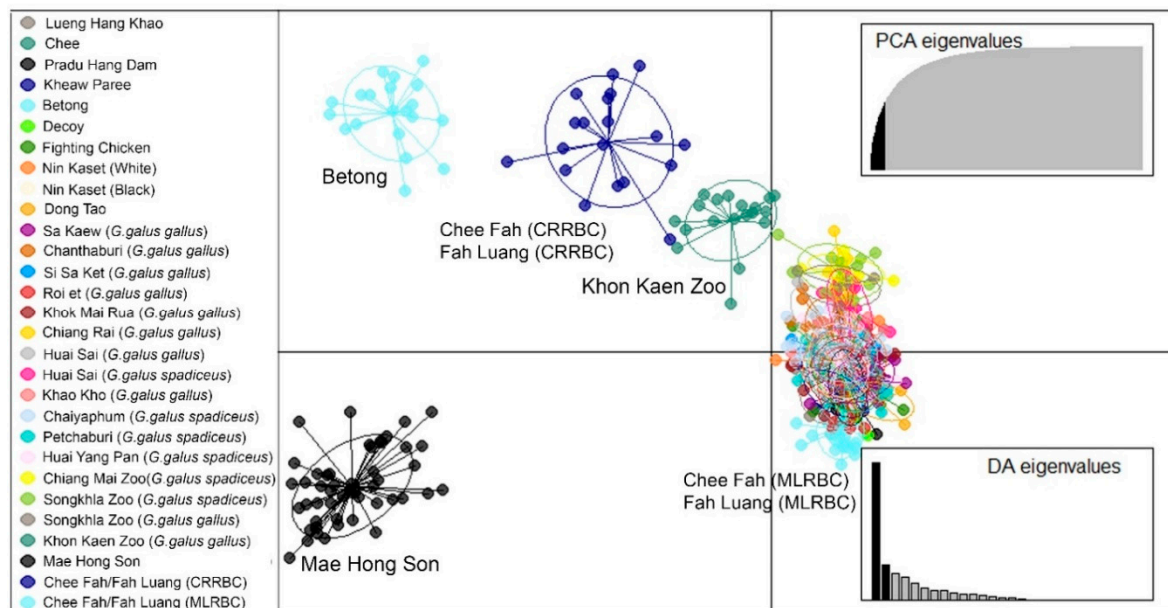

**Figure S14.** Discriminant Analysis of Principal Components (DAPC) of Chee Fah and Fah Luang Chickens from Chiang Rai Livestock Research and Breeding Center (CRRBC) and Mae Hong Son Livestock Research and Breeding Center (MLRBC) with red junglefowl and domestic breeds. Scatter plots based on DAPC output for assigned genetic clusters are indicated by different colors. Dots represent different individuals.

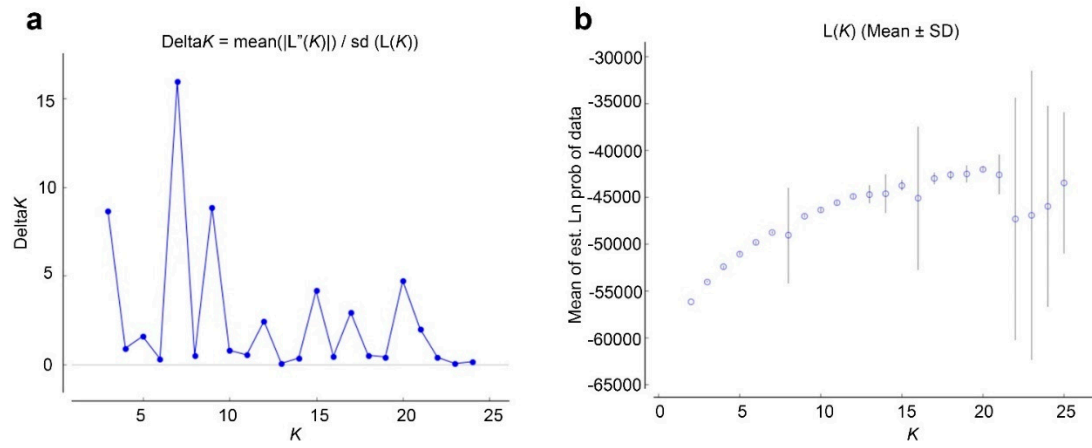

**Figure S15.** Different population structure patterns of Chee Fah ( $n = 20$ ), Fah Luang ( $n = 19$ ), red junglefowl and domestic chicken breeds, generated by model-based Bayesian clustering algorithms implemented in STRUCTURE. (a) Plot of Evanno's  $\Delta K$  and (b) Plot of  $\ln P(K)$ .



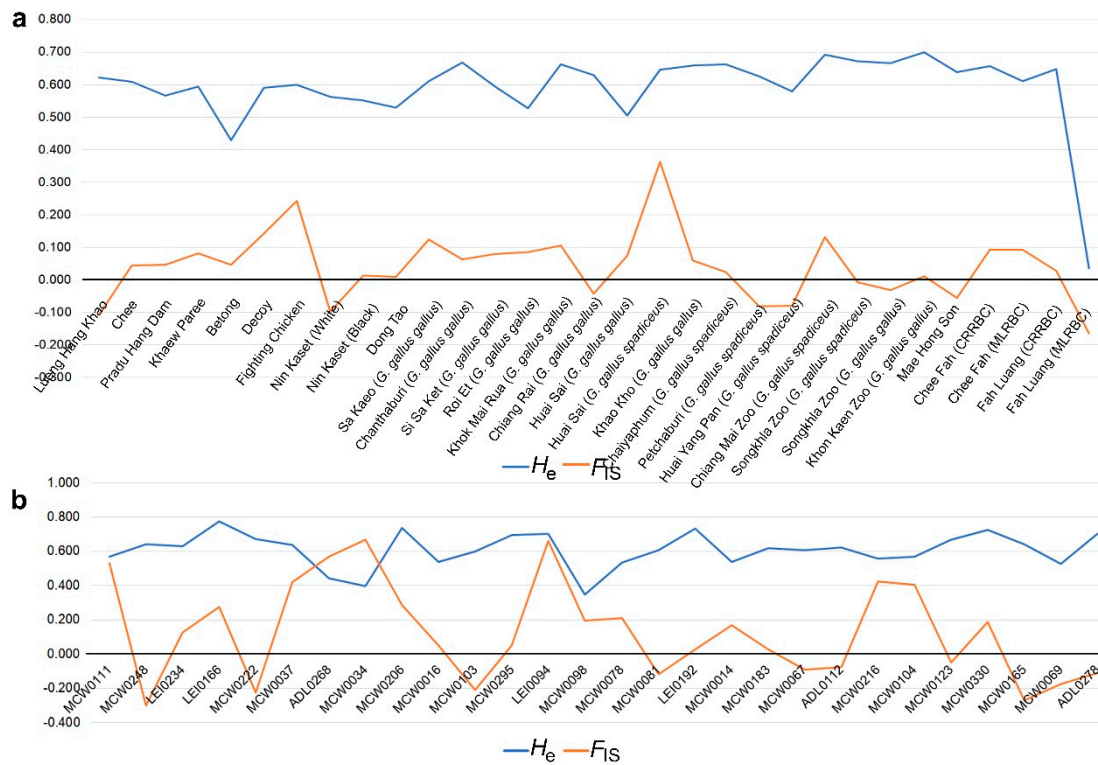

CRRBC = Chiang Rai Livestock Research and Breeding Center, Chiang Rai  
MLRBC = Mae Hong Son Livestock Research and Breeding Center, Mae Hong Son

**Figure S16.** Mapping of expected heterozygosity ( $H_e$ ) against inbreeding coefficients ( $F_{IS}$ ) along the length of the physical map. (a) Chee Fah and Fah Luang chicken breeds, red junglefowl and domestic chicken breeds and (b) microsatellite loci.

## 2.2 Supplementary Tables

**Table S1** Representative specimens of two populations of Chee Fah and Fah Luang chicken breeds in Thailand. All mtDNA D-loop sequences were deposited in the DNA Data Bank of Japan (DDBJ).

| No. | Abbreviation/<br>Code | Sex    | Locality                                                 | Mitochondrial D-loop DDBJ<br>accession number | Haplogroup |
|-----|-----------------------|--------|----------------------------------------------------------|-----------------------------------------------|------------|
| 1   | CF1                   | Male   | Chiang Rai Livestock Research and Breeding Center, CRRBC | LC740535                                      | B          |
| 2   | CF2                   | Male   | Chiang Rai Livestock Research and Breeding Center, CRRBC | LC740540                                      | B          |
| 3   | CF3                   | Male   | Chiang Rai Livestock Research and Breeding Center, CRRBC | LC740530                                      | B          |
| 4   | CF4                   | Female | Chiang Rai Livestock Research and Breeding Center, CRRBC | LC740544                                      | B          |
| 5   | CF5                   | Female | Chiang Rai Livestock Research and Breeding Center, CRRBC | LC740537                                      | B          |
| 6   | CF6                   | Female | Chiang Rai Livestock Research and Breeding Center, CRRBC | LC740541                                      | B          |
| 7   | CF7                   | Female | Chiang Rai Livestock Research and Breeding Center, CRRBC | LC740538                                      | B          |
| 8   | CF8                   | Female | Chiang Rai Livestock Research and Breeding Center, CRRBC | LC740543                                      | B          |
| 9   | CF9                   | Female | Chiang Rai Livestock Research and Breeding Center, CRRBC | LC740529                                      | B          |
| 10  | CF10                  | Female | Chiang Rai Livestock Research and Breeding Center, CRRBC | LC740545                                      | B          |
| 11  | CFM1                  | Male   | Maehongson Livestock Research and Breeding Center, MLRBC | LC740526                                      | B          |
| 12  | CFM2                  | Male   | Maehongson Livestock Research and Breeding Center, MLRBC | LC740527                                      | B          |
| 13  | CFM3                  | Male   | Maehongson Livestock Research and Breeding Center, MLRBC | LC740531                                      | B          |
| 14  | CFM4                  | Male   | Maehongson Livestock Research and Breeding Center, MLRBC | LC740542                                      | B          |
| 15  | CFM5                  | Male   | Maehongson Livestock Research and Breeding Center, MLRBC | LC740536                                      | B          |
| 16  | CFFM1                 | Female | Maehongson Livestock Research and Breeding Center, MLRBC | LC740528                                      | B          |
| 17  | CFFM2                 | Female | Maehongson Livestock Research and Breeding Center, MLRBC | LC740533                                      | B          |
| 18  | CFFM3                 | Female | Maehongson Livestock Research and Breeding Center, MLRBC | LC740534                                      | B          |

| No. | Abbreviation/<br>Code | Sex    | Locality                                                 | Mitochondrial D-loop DDBJ<br>accession number | Haplogroup |
|-----|-----------------------|--------|----------------------------------------------------------|-----------------------------------------------|------------|
| 19  | CFFM4                 | Female | Maehongson Livestock Research and Breeding Center, MLRBC | LC740532                                      | B          |
| 20  | CFFM5                 | Female | Maehongson Livestock Research and Breeding Center, MLRBC | LC740539                                      | B          |
| 21  | FL1                   | Male   | Chiang Rai Livestock Research and Breeding Center, CRRBC | LC740563                                      | A          |
| 22  | FL2                   | Male   | Chiang Rai Livestock Research and Breeding Center, CRRBC | LC740550                                      | B          |
| 23  | FL3                   | Male   | Chiang Rai Livestock Research and Breeding Center, CRRBC | LC740559                                      | B          |
| 24  | FL5                   | Female | Chiang Rai Livestock Research and Breeding Center, CRRBC | LC740564                                      | B          |
| 25  | FL6                   | Female | Chiang Rai Livestock Research and Breeding Center, CRRBC | LC740552                                      | B          |
| 26  | FL7                   | Female | Chiang Rai Livestock Research and Breeding Center, CRRBC | LC740551                                      | A          |
| 27  | FL8                   | Female | Chiang Rai Livestock Research and Breeding Center, CRRBC | LC740555                                      | B          |
| 28  | FL9                   | Female | Chiang Rai Livestock Research and Breeding Center, CRRBC | LC740553                                      | B          |
| 29  | FL10                  | Female | Chiang Rai Livestock Research and Breeding Center, CRRBC | LC740554                                      | B          |
| 30  | FLM1                  | Male   | Maehongson Livestock Research and Breeding Center, MLRBC | LC740546                                      | B          |
| 31  | FLM2                  | Male   | Maehongson Livestock Research and Breeding Center, MLRBC | LC740549                                      | B          |
| 32  | FLM3                  | Male   | Maehongson Livestock Research and Breeding Center, MLRBC | LC740547                                      | B          |
| 33  | FLM4                  | Male   | Maehongson Livestock Research and Breeding Center, MLRBC | LC740556                                      | B          |
| 34  | FLM5                  | Male   | Maehongson Livestock Research and Breeding Center, MLRBC | LC740548                                      | B          |
| 35  | FLFM1                 | Female | Maehongson Livestock Research and Breeding Center, MLRBC | LC740561                                      | B          |
| 36  | FLFM2                 | Female | Maehongson Livestock Research and Breeding Center, MLRBC | LC740557                                      | B          |
| 37  | FLFM3                 | Female | Maehongson Livestock Research and Breeding Center, MLRBC | LC740562                                      | CD         |
| 38  | FLFM4                 | Female | Maehongson Livestock Research and Breeding Center, MLRBC | LC740558                                      | A          |
| 39  | FLFM5                 | Female | Maehongson Livestock Research and Breeding Center, MLRBC | LC740560                                      | B          |

**Table S2** Microsatellite primers and sequences of Chee Fah and Fah Luang chicken specimens.

| Primer  | Chromosome | Annealing<br>temperate<br>(°C) | Fluorescence | Primer sequence 5' to 3' |                          | Size (bp) |
|---------|------------|--------------------------------|--------------|--------------------------|--------------------------|-----------|
|         |            |                                |              | Forward                  | Reverse                  |           |
| ADL0268 | 1          | 58                             | Hex          | CTCCACCCCTCTCAGAACTA     | CAACTTCCCATCTACCTACT     | 106–127   |
| MCW0111 | 1          | 58                             | Hex          | GCTCCATGTGAAGTGGTTTA     | GCTCCATGTGAAGTGGTTTA     | 94–120    |
| MCW0247 | 1          | 58                             | Fam          | GTTGTTCAAAAGAAGATGCATG   | TTGCATTAAGTGGGCACTTTC    | 208–222   |
| LEI0234 | 2          | 58                             | Hex          | ATGCATCAGATTGGTATTCAA    | CGTGGCTGTGAACAAATATG     | 218–373   |
| MCW0034 | 2          | 58                             | Hex          | ATCTTGAAACCTCACAAAGC     | TCTTCCAACCTATTTTATAGT    | 211–241   |
| MCW0206 | 2          | 58                             | Fam          | CTTGACAGTGATGCATTAAATG   | ACATCTAGAATTGACTGTTTAC   | 217–247   |
| LEI0166 | 3          | 58                             | Hex          | CTCCTGCCCTTAGCTACGCA     | TATCCCCTGGCTGGGAGTTT     | 338–365   |
| MCW0222 | 3          | 58                             | Hex          | GCAGTTACATTGAAATGATTCC   | TTCTCAAAACACCTAGAAGAC    | 218–230   |
| MCW0016 | 3          | 58                             | Fam          | ATGGCGCAGAAGGCAAAGCGATAT | TGGCTTCTGAAGCAGTTGCTATGG | 126–177   |
| MCW0037 | 3          | 58                             | Fam          | ACCGGTGCCATCAATTACCTATTA | GAAAGCTCACATGACACTGCGAAA | 149–154   |
| MCW0103 | 3          | 58                             | Fam          | AACTGCGTTGAGAGTGAATGC    | TTTCCTAACTGGATGCTTCTG    | 263–270   |
| MCW0295 | 4          | 58                             | Fam          | ATCACTACAGAACCCCTCTC     | TATGTATGCACGCAGATATCC    | 82–111    |
| LEI0094 | 4          | 58                             | Hex          | GATCTCACCAGTATGAGCTGC    | TCTCACACTGTAACACAGTGC    | 243–281   |
| MCW0078 | 5          | 58                             | Hex          | CCACACGAGAGAGAGAAGGTCT   | TAGCATATGAGTGTACTGAGCTTC | 144–154   |
| MCW0098 | 4          | 58                             | Hex          | GGCTGCTTTGTGCTCTTCTCG    | CGATGGTCGTAATTCTCACGT    | 247–257   |
| MCW0081 | 5          | 58                             | Fam          | GTTGCTGAGAGCCTGGTGCAG    | CCTGTATGTGGAATTACTTCTC   | 107–146   |
| LEI0192 | 6          | 58                             | Hex          | TGCCAGAGCTTCAGTCTGT      | GTCATTACTGTTATGTTTATTGC  | 251–490   |
| MCW0014 | 6          | 58                             | Hex          | TATTGGCTCTAGGAAGTGC      | GAAATGAAGGTAAGACTAGC     | 169–202   |
| MCW0183 | 7          | 58                             | Hex          | ATCCCAGTGTCGAGTATCCGA    | TGAGATTTACTGGAGCCTGCC    | 293–361   |
| ADL0278 | 8          | 58                             | Hex          | CCAGCAGTCTACCTTCCTAT     | TGTCATCCAAGAACAGTGTG     | 118–136   |
| MCW0067 | 10         | 58                             | Fam          | GCACTACTGTGTGCTGCAGTTT   | GAGATGTAGTTGCCACATTCGGAC | 170–182   |
| ADL0112 | 10         | 58                             | Hex          | GGCTTAAGCTGACCCATTAT     | ATCTCAAATGTAATGCGTGC     | 132–142   |
| MCW0216 | 13         | 58                             | Hex          | GGGTTTTACAGGATGGGACG     | AGTTTCACTCCCAGGGCTCG     | 135–170   |
| MCW0104 | 13         | 58                             | Hex          | TAGCACAACCTCAAGCTGTGAG   | AGACTTGCACAGCTGTGACC     | 194–249   |
| MCW0123 | 14         | 58                             | Hex          | CCACTAGAAAAGAACATCCTC    | GGCTGATGTAAGAAGGGATGA    | 84–106    |
| MCW0330 | 17         | 58                             | Hex          | TGGACCTCATCAGTCTGACAG    | AATGTTCTCATAGAGTTCCTGC   | 259–291   |
| MCW0165 | 23         | 58                             | Hex          | CAGACATGCATGCCCAGATGA    | GATCCAGTCCTGCAGGCTGC     | 111–115   |
| MCW0069 | 26         | 58                             | Hex          | GCACTCGAGAAAACCTTCCTGCG  | ATTGCTTCAGCAAGCATGGGAGGA | 155–178   |

HEX = HEX<sup>TM</sup> Dye Phosphoramidite, FAM = 6-FAM (6-Carboxyfluorescein)

**Table S3** Comparison of environmental factors at local chicken farms in Chiang Rai and Mae Hong Son provinces.

| <b>Variable</b>      | <b>t-test</b> | <b><i>p</i>-value</b>  |
|----------------------|---------------|------------------------|
| Elevation            | 34.74         | $<2.2 \times 10^{-16}$ |
| Annual Precipitation | 74.09         | $<2.2 \times 10^{-16}$ |
| Annual Temperature   | -42.9         | $<2.2 \times 10^{-16}$ |

**Table S4** Genetic differentiation between two populations of Chee Fah and Fah Luang chicken for mitochondrial DNA D-loop sequence. Genetic differentiation coefficient ( $G_{ST}$ ), Wright's  $F$ -statistics for subpopulations within the total population ( $F_{ST}$ ),  $\Phi_{ST}$  from sequence data and haplotype data, average number of nucleotide substitutions per site between populations ( $D_{xy}$ ) and net nucleotide substitutions per site between populations ( $D_a$ ). Detailed information on all of the Chee Fah and Fah Luang chicken individuals is presented in Table S1.

| Breed     | Population 1       | Population 2       | $F_{ST}$ | $G_{ST}$ | $\Phi_{ST}$ | $D_{xy}$ | $D_a$  |
|-----------|--------------------|--------------------|----------|----------|-------------|----------|--------|
| Chee Fah  | MLRBC <sup>1</sup> | CRRBC <sup>2</sup> | 0.044*   | 0.023    | 0.044       | 0.006    | 0.0003 |
| Fah Luang | MLRBC <sup>1</sup> | CRRBC <sup>2</sup> | 0.014*   | 0.008    | 0.014       | 0.007    | 0.0008 |

\* $p < 0.05$

<sup>1</sup>CRRBC = Chiang Rai Livestock Research and Breeding Center, Chiang Rai

<sup>2</sup>MLRBC = Mae Hong Son Livestock Research and Breeding Center, Mae Hong Son

**Table S5** Pairwise differentiation of linkage disequilibrium of Chee Fah chicken individuals at Chiang Rai Livestock Research and Breeding Center (CRRBC) based on 28 microsatellite loci. Numbers indicate *p*-values with 110 permutations. Detailed information on all of the Chee Fah and Fah Luang chicken individuals is presented in Table S1.

| Locus       | MCW0<br>111 | MCW0<br>247 | LEI0<br>234 | LEI0<br>166 | MCW0<br>222 | MCW0<br>037 | ADL0<br>268 | MCW0<br>034 | MCW0<br>206 | MCW0<br>016 | MCW0<br>103 | MCW0<br>295 | LEI0<br>094 | MCW0<br>098 | MCW0<br>078 | MCW0<br>081 | LEI0<br>192 | MCW0<br>014 | MCW0<br>183 | MCW0<br>067 | ADL0<br>112 | MCW0<br>216 | MCW0<br>104 | MCW0<br>123 | MCW0<br>330 | MCW0<br>165 | MCW0<br>069 | ADL0<br>278 |  |
|-------------|-------------|-------------|-------------|-------------|-------------|-------------|-------------|-------------|-------------|-------------|-------------|-------------|-------------|-------------|-------------|-------------|-------------|-------------|-------------|-------------|-------------|-------------|-------------|-------------|-------------|-------------|-------------|-------------|--|
| MCW0<br>111 | 0.000       |             |             |             |             |             |             |             |             |             |             |             |             |             |             |             |             |             |             |             |             |             |             |             |             |             |             |             |  |
| MCW0<br>247 | 0.273       | 0.000       |             |             |             |             |             |             |             |             |             |             |             |             |             |             |             |             |             |             |             |             |             |             |             |             |             |             |  |
| LEI023<br>4 | 0.303       | 0.180       | 0.000       |             |             |             |             |             |             |             |             |             |             |             |             |             |             |             |             |             |             |             |             |             |             |             |             |             |  |
| LEI016<br>6 | 0.208       | 0.930       | 1.000       | 0.000       |             |             |             |             |             |             |             |             |             |             |             |             |             |             |             |             |             |             |             |             |             |             |             |             |  |
| MCW0<br>222 | 0.230       | 0.191       | 0.220       | 0.561       | 0.000       |             |             |             |             |             |             |             |             |             |             |             |             |             |             |             |             |             |             |             |             |             |             |             |  |
| MCW0<br>037 | 0.478       | 0.257       | 1.000       | 0.800       | 0.435       | 0.000       |             |             |             |             |             |             |             |             |             |             |             |             |             |             |             |             |             |             |             |             |             |             |  |
| ADL02<br>68 | 0.314       | 0.668       | 1.000       | 0.533       | 0.553       | 0.042       | 0.000       |             |             |             |             |             |             |             |             |             |             |             |             |             |             |             |             |             |             |             |             |             |  |
| MCW0<br>034 | 0.105       | 0.056       | 1.000       | 0.683       | 0.212       | 0.691       | 0.709       | 0.000       |             |             |             |             |             |             |             |             |             |             |             |             |             |             |             |             |             |             |             |             |  |
| MCW0<br>206 | 0.807       | 1.000       | 1.000       | 0.449       | 0.912       | 1.000       | 0.450       | 1.000       | 0.000       |             |             |             |             |             |             |             |             |             |             |             |             |             |             |             |             |             |             |             |  |
| MCW0<br>016 | 0.016       | 0.784       | 0.158       | 0.191       | 0.201       | 0.263       | 0.673       | 0.435       | 0.634       | 0.000       |             |             |             |             |             |             |             |             |             |             |             |             |             |             |             |             |             |             |  |
| MCW0<br>103 | 0.745       | 0.472       | 0.444       | 0.682       | 1.000       | 0.855       | 0.686       | 0.450       | 1.000       | 1.000       | 0.000       |             |             |             |             |             |             |             |             |             |             |             |             |             |             |             |             |             |  |
| MCW0<br>295 | 0.134       | 0.255       | 0.768       | 0.883       | 0.379       | 0.003       | 0.067       | 0.227       | 1.000       | 0.060       | 0.828       | 0.000       |             |             |             |             |             |             |             |             |             |             |             |             |             |             |             |             |  |
| LEI009<br>4 | 0.830       | 1.000       | 1.000       | 0.358       | 0.833       | 0.218       | 0.169       | 1.000       | 1.000       | 0.590       | 0.412       | 0.341       | 0.000       |             |             |             |             |             |             |             |             |             |             |             |             |             |             |             |  |
| MCW0<br>098 | 0.564       | 0.599       | 0.008       | 1.000       | 1.000       | 0.719       | 0.802       | 1.000       | 0.363       | 0.321       | 0.311       | 0.249       | 0.910       | 0.000       |             |             |             |             |             |             |             |             |             |             |             |             |             |             |  |
| MCW0<br>078 | 0.227       | 1.000       | 0.810       | 0.549       | 0.377       | 0.596       | 0.550       | 0.236       | 0.912       | 0.199       | 0.675       | 0.376       | 0.300       | 1.000       | 0.000       |             |             |             |             |             |             |             |             |             |             |             |             |             |  |
| MCW0<br>081 | 1.000       | 0.452       | 1.000       | 0.516       | 0.389       | 0.875       | 0.945       | 1.000       | 0.291       | 0.917       | 0.278       | 1.000       | 1.000       | 1.000       | 0.797       | 0.000       |             |             |             |             |             |             |             |             |             |             |             |             |  |
| LEI019<br>2 | 0.489       | 0.393       | 1.000       | 0.270       | 0.626       | 1.000       | 1.000       | 1.000       | 1.000       | 1.000       | 0.393       | 1.000       | 1.000       | 1.000       | 1.000       | 1.000       | 0.000       |             |             |             |             |             |             |             |             |             |             |             |  |
| MCW0<br>014 | 1.000       | 0.844       | 0.798       | 0.966       | 1.000       | 1.000       | 0.372       | 1.000       | 1.000       | 0.835       | 0.596       | 1.000       | 0.582       | 0.781       | 0.735       | 0.928       | 1.000       | 0.000       |             |             |             |             |             |             |             |             |             |             |  |
| MCW0<br>183 | 1.000       | 1.000       | 0.534       | 1.000       | 0.444       | 0.383       | 1.000       | 1.000       | 1.000       | 0.528       | 0.526       | 0.712       | 1.000       | 0.524       | 1.000       | 0.574       | 1.000       | 0.443       | 0.000       |             |             |             |             |             |             |             |             |             |  |
| MCW0<br>067 | 0.905       | 1.000       | 1.000       | 0.386       | 0.661       | 0.354       | 0.053       | 1.000       | 0.241       | 0.790       | 1.000       | 0.456       | 0.531       | 0.363       | 0.658       | 0.682       | 1.000       | 0.293       | 1.000       | 0.000       |             |             |             |             |             |             |             |             |  |
| ADL01<br>12 | 0.418       | 0.860       | 0.031       | 0.471       | 0.395       | 0.514       | 0.793       | 0.870       | 0.626       | 0.031       | 0.438       | 0.119       | 0.924       | 0.039       | 0.386       | 0.286       | 1.000       | 1.000       | 0.279       | 0.158       | 0.000       |             |             |             |             |             |             |             |  |
| MCW0<br>216 | 0.344       | 0.059       | 0.772       | 0.588       | 0.378       | 1.000       | 1.000       | 0.054       | 1.000       | 0.829       | 1.000       | 1.000       | 1.000       | 0.865       | 1.000       | 0.574       | 0.249       | 0.809       | 0.715       | 1.000       | 0.751       | 0.000       |             |             |             |             |             |             |  |
| MCW0<br>104 | 0.503       | 1.000       | 0.672       | 0.637       | 0.772       | 0.716       | 0.547       | 0.668       | 1.000       | 0.264       | 0.255       | 0.235       | 0.156       | 0.704       | 0.238       | 0.930       | 1.000       | 0.647       | 1.000       | 0.856       | 0.286       | 0.818       | 0.000       |             |             |             |             |             |  |
| MCW0<br>123 | 0.047       | 0.236       | 0.812       | 0.025       | 0.385       | 0.267       | 0.421       | 0.779       | 0.485       | 0.248       | 0.530       | 0.465       | 0.639       | 0.273       | 0.364       | 0.661       | 0.293       | 0.916       | 1.000       | 0.505       | 0.398       | 0.716       | 0.829       | 0.000       |             |             |             |             |  |
| MCW0<br>330 | N/A         | 0.000       |             |             |  |
| MCW0<br>165 | 0.417       | 0.861       | 0.030       | 0.473       | 0.406       | 0.499       | 0.790       | 0.863       | 0.619       | 0.035       | 0.461       | 0.096       | 0.927       | 0.034       | 0.402       | 0.292       | 1.000       | 1.000       | 0.279       | 0.146       | 0.001       | 0.749       | 0.269       | 0.415       | N/A         | 0.000       |             |             |  |
| MCW0<br>069 | 0.054       | 0.065       | 0.040       | 0.910       | 0.136       | 1.000       | 0.890       | 0.531       | 1.000       | 0.214       | 0.576       | 0.952       | 0.783       | 0.166       | 0.702       | 0.773       | 0.156       | 0.965       | 0.467       | 1.000       | 0.485       | 0.266       | 0.837       | 0.322       | N/A         | 0.446       | 0.000       |             |  |
| ADL02<br>78 | 0.275       | 0.046       | 0.338       | 0.698       | 0.220       | 0.162       | 0.711       | 1.000       | 1.000       | 0.159       | 0.934       | 0.202       | 0.544       | 0.148       | 0.797       | 0.529       | 1.000       | 0.690       | 0.164       | 0.445       | 0.183       | 0.776       | 1.000       | 0.019       | N/A         | 0.169       | 0.501       | 0.000       |  |

**Table S6** Pairwise differentiation of linkage disequilibrium of Chee Fah chicken individuals at Mae Hong Son Livestock Research and Breeding Center (MLRBC) based on 28 microsatellite loci. Numbers indicate  $p$ -values with 110 permutations. Detailed information on all of the Chee Fah and Fah Luang chicken individuals is presented in Table S1.

| Locus       | MCW0<br>111 | MCW0<br>247 | LEI0<br>234 | LEI0<br>166 | MCW0<br>222 | MCW0<br>037 | ADL0<br>268 | MCW0<br>034 | MCW0<br>206 | MCW0<br>016 | MCW0<br>103 | MCW0<br>295 | LEI0<br>094 | MCW0<br>098 | MCW0<br>078 | MCW0<br>081 | LEI0<br>192 | MCW0<br>014 | MCW0<br>183 | MCW0<br>067 | ADL0<br>112 | MCW0<br>216 | MCW0<br>104 | MCW0<br>123 | MCW0<br>330 | MCW0<br>165 | MCW0<br>069 | ADL0<br>278 |
|-------------|-------------|-------------|-------------|-------------|-------------|-------------|-------------|-------------|-------------|-------------|-------------|-------------|-------------|-------------|-------------|-------------|-------------|-------------|-------------|-------------|-------------|-------------|-------------|-------------|-------------|-------------|-------------|-------------|
| MCW0<br>111 | 0.000       |             |             |             |             |             |             |             |             |             |             |             |             |             |             |             |             |             |             |             |             |             |             |             |             |             |             |             |
| MCW0<br>247 | 0.389       | 0.000       |             |             |             |             |             |             |             |             |             |             |             |             |             |             |             |             |             |             |             |             |             |             |             |             |             |             |
| LEI023<br>4 | 0.302       | 0.067       | 0.000       |             |             |             |             |             |             |             |             |             |             |             |             |             |             |             |             |             |             |             |             |             |             |             |             |             |
| LEI016<br>6 | 0.707       | 0.238       | 0.876       | 0.000       |             |             |             |             |             |             |             |             |             |             |             |             |             |             |             |             |             |             |             |             |             |             |             |             |
| MCW0<br>222 | 1.000       | 0.209       | 1.000       | 0.921       | 0.000       |             |             |             |             |             |             |             |             |             |             |             |             |             |             |             |             |             |             |             |             |             |             |             |
| MCW0<br>037 | 1.000       | 0.013       | 0.461       | 0.916       | 0.119       | 0.000       |             |             |             |             |             |             |             |             |             |             |             |             |             |             |             |             |             |             |             |             |             |             |
| ADL02<br>68 | 0.369       | 0.771       | 0.488       | 0.508       | 0.562       | 1.000       | 0.000       |             |             |             |             |             |             |             |             |             |             |             |             |             |             |             |             |             |             |             |             |             |
| MCW0<br>034 | 0.326       | 0.772       | 0.937       | 0.324       | 1.000       | 1.000       | 0.277       | 0.000       |             |             |             |             |             |             |             |             |             |             |             |             |             |             |             |             |             |             |             |             |
| MCW0<br>206 | 0.303       | 0.070       | 0.000       | 0.878       | 1.000       | 0.482       | 0.480       | 0.931       | 0.000       |             |             |             |             |             |             |             |             |             |             |             |             |             |             |             |             |             |             |             |
| MCW0<br>016 | 1.000       | 0.231       | 0.404       | 0.094       | 1.000       | 0.485       | 1.000       | 0.927       | 0.418       | 0.000       |             |             |             |             |             |             |             |             |             |             |             |             |             |             |             |             |             |             |
| MCW0<br>103 | 0.370       | 1.000       | 0.953       | 0.621       | 0.763       | 1.000       | 0.765       | 0.758       | 0.954       | 0.522       | 0.000       |             |             |             |             |             |             |             |             |             |             |             |             |             |             |             |             |             |
| MCW0<br>295 | 0.149       | 0.730       | 1.000       | 0.113       | 1.000       | 1.000       | 0.261       | 0.720       | 1.000       | 1.000       | 0.162       | 0.000       |             |             |             |             |             |             |             |             |             |             |             |             |             |             |             |             |
| LEI009<br>4 | 0.587       | 0.070       | 0.733       | 0.286       | 0.826       | 0.320       | 0.806       | 0.600       | 0.727       | 0.752       | 0.705       | 0.054       | 0.000       |             |             |             |             |             |             |             |             |             |             |             |             |             |             |             |
| MCW0<br>098 | 0.326       | 0.116       | 0.442       | 1.000       | 1.000       | 0.220       | 1.000       | 1.000       | 0.443       | 0.651       | 1.000       | 1.000       | 0.551       | 0.000       |             |             |             |             |             |             |             |             |             |             |             |             |             |             |
| MCW0<br>078 | 0.542       | 1.000       | 0.155       | 0.508       | 0.773       | 1.000       | 0.066       | 0.120       | 0.153       | 1.000       | 0.816       | 0.384       | 0.622       | 1.000       | 0.000       |             |             |             |             |             |             |             |             |             |             |             |             |             |
| MCW0<br>081 | 1.000       | 1.000       | 1.000       | 1.000       | 1.000       | 0.454       | 1.000       | 0.624       | 1.000       | 1.000       | 0.622       | 1.000       | 0.683       | 1.000       | 1.000       | 0.000       |             |             |             |             |             |             |             |             |             |             |             |             |
| LEI019<br>2 | 1.000       | 0.729       | 1.000       | 0.563       | 0.251       | 1.000       | 1.000       | 0.701       | 1.000       | 1.000       | 1.000       | 1.000       | 0.433       | 0.557       | 0.394       | 1.000       | 0.000       |             |             |             |             |             |             |             |             |             |             |             |
| MCW0<br>014 | 1.000       | 1.000       | 1.000       | 1.000       | 1.000       | 1.000       | 1.000       | 1.000       | 1.000       | 1.000       | 0.394       | 1.000       | 1.000       | 0.743       | 1.000       | 0.106       | 1.000       | 0.000       |             |             |             |             |             |             |             |             |             |             |
| MCW0<br>183 | 1.000       | 1.000       | 1.000       | 0.533       | 0.342       | 1.000       | 1.000       | 1.000       | 1.000       | 1.000       | 0.669       | 1.000       | 1.000       | 1.000       | 1.000       | 1.000       | 1.000       | 1.000       | 0.000       |             |             |             |             |             |             |             |             |             |
| MCW0<br>067 | 0.063       | 0.657       | 1.000       | 0.393       | 1.000       | 1.000       | 0.724       | 0.804       | 1.000       | 0.621       | 0.112       | 0.393       | 0.233       | 0.341       | 1.000       | 0.628       | 1.000       | 0.233       | 0.278       | 0.000       |             |             |             |             |             |             |             |             |
| ADL01<br>12 | 1.000       | 0.734       | 1.000       | 0.114       | 0.273       | 1.000       | 1.000       | 0.711       | 1.000       | 1.000       | 1.000       | 1.000       | 1.000       | 1.000       | 1.000       | 1.000       | 1.000       | 1.000       | 0.103       | 1.000       | 0.000       |             |             |             |             |             |             |             |
| MCW0<br>216 | 1.000       | 0.899       | 0.298       | 0.686       | 1.000       | 1.000       | 1.000       | 0.908       | 0.291       | 1.000       | 0.383       | 0.168       | 0.145       | 1.000       | 0.105       | 1.000       | 1.000       | 1.000       | 1.000       | 0.524       | 1.000       | 0.000       |             |             |             |             |             |             |
| MCW0<br>104 | 1.000       | 1.000       | 1.000       | 0.428       | 0.200       | 1.000       | 1.000       | 1.000       | 1.000       | 1.000       | 1.000       | 1.000       | 1.000       | 1.000       | 1.000       | 1.000       | 1.000       | N/A         | 0.057       | 1.000       | 0.089       | 1.000       | 0.000       |             |             |             |             |             |
| MCW0<br>123 | 1.000       | 1.000       | 1.000       | 1.000       | 1.000       | 1.000       | 1.000       | 0.277       | 1.000       | 1.000       | 0.275       | 0.276       | 1.000       | 1.000       | 0.509       | 1.000       | 1.000       | N/A         | 1.000       | 1.000       | 1.000       | 0.296       | 1.000       | 0.000       |             |             |             |             |
| MCW0<br>330 | 1.000       | 1.000       | 1.000       | 1.000       | 1.000       | 1.000       | 1.000       | 1.000       | 1.000       | 1.000       | 0.429       | 1.000       | 1.000       | 0.784       | 1.000       | 0.124       | 1.000       | 0.022       | 1.000       | 0.188       | 1.000       | 1.000       | N/A         | N/A         | 0.000       |             |             |             |
| MCW0<br>165 | 1.000       | 0.906       | 1.000       | 1.000       | 0.726       | 0.728       | 0.735       | 0.253       | 1.000       | 0.619       | 0.114       | 1.000       | 0.510       | 1.000       | 0.904       | 0.138       | 1.000       | 0.224       | 1.000       | 0.165       | 1.000       | 0.503       | 1.000       | 0.512       | 0.198       | 0.000       |             |             |
| MCW0<br>069 | 1.000       | 0.896       | 1.000       | 0.705       | 0.386       | 1.000       | 0.361       | 0.900       | 1.000       | 1.000       | 0.395       | 1.000       | 1.000       | 1.000       | 0.571       | 1.000       | 1.000       | 1.000       | 1.000       | 0.481       | 1.000       | 0.241       | 1.000       | 1.000       | 1.000       | 0.069       | 0.000       |             |
| ADL02<br>78 | 1.000       | 0.424       | 1.000       | 0.654       | 0.348       | 1.000       | 1.000       | 0.810       | 1.000       | 1.000       | 1.000       | 1.000       | 0.653       | 0.428       | 1.000       | 1.000       | 0.083       | N/A         | 1.000       | 1.000       | 0.184       | 1.000       | 1.000       | 1.000       | N/A         | 1.000       | 1.000       | 0.000       |



**Table S7** Pairwise differentiation of linkage disequilibrium of Fah Luang chicken individuals at Chiang Rai Livestock Research and Breeding Center (CRRBC) based on 28 microsatellite loci. Numbers indicate  $p$ -values with 110 permutations. Detailed information on all of the Chee Fah and Fah Luang chicken individuals is presented in Table S1

| Locus       | MCW0<br>111 | MCW0<br>247 | LEI0<br>234 | LEI0<br>166 | MCW0<br>222 | MCW0<br>037 | ADL0<br>268 | MCW0<br>034 | MCW0<br>206 | MCW0<br>016 | MCW0<br>103 | MCW0<br>295 | LEI0<br>094 | MCW0<br>098 | MCW0<br>078 | MCW0<br>081 | LEI0<br>192 | MCW0<br>014 | MCW0<br>183 | MCW0<br>067 | ADL0<br>112 | MCW0<br>216 | MCW0<br>104 | MCW0<br>123 | MCW0<br>330 | MCW0<br>165 | MCW0<br>069 | ADL0<br>278 |
|-------------|-------------|-------------|-------------|-------------|-------------|-------------|-------------|-------------|-------------|-------------|-------------|-------------|-------------|-------------|-------------|-------------|-------------|-------------|-------------|-------------|-------------|-------------|-------------|-------------|-------------|-------------|-------------|-------------|
| MCW0<br>111 | 0.000       |             |             |             |             |             |             |             |             |             |             |             |             |             |             |             |             |             |             |             |             |             |             |             |             |             |             |             |
| MCW0<br>247 | 0.390       | 0.000       |             |             |             |             |             |             |             |             |             |             |             |             |             |             |             |             |             |             |             |             |             |             |             |             |             |             |
| LEI023<br>4 | 0.302       | 0.067       | 0.000       |             |             |             |             |             |             |             |             |             |             |             |             |             |             |             |             |             |             |             |             |             |             |             |             |             |
| LEI016<br>6 | 0.707       | 0.238       | 0.876       | 0.000       |             |             |             |             |             |             |             |             |             |             |             |             |             |             |             |             |             |             |             |             |             |             |             |             |
| MCW0<br>222 | 1.000       | 0.209       | 1.000       | 0.921       | 0.000       |             |             |             |             |             |             |             |             |             |             |             |             |             |             |             |             |             |             |             |             |             |             |             |
| MCW0<br>037 | 1.000       | 0.013       | 0.461       | 0.916       | 0.119       | 0.000       |             |             |             |             |             |             |             |             |             |             |             |             |             |             |             |             |             |             |             |             |             |             |
| ADL02<br>68 | 0.369       | 0.772       | 0.488       | 0.508       | 0.562       | 1.000       | 0.000       |             |             |             |             |             |             |             |             |             |             |             |             |             |             |             |             |             |             |             |             |             |
| MCW0<br>034 | 0.326       | 0.772       | 0.937       | 0.324       | 1.000       | 1.000       | 0.277       | 0.000       |             |             |             |             |             |             |             |             |             |             |             |             |             |             |             |             |             |             |             |             |
| MCW0<br>206 | 0.303       | 0.070       | 0.000       | 0.878       | 1.000       | 0.482       | 0.480       | 0.931       | 0.000       |             |             |             |             |             |             |             |             |             |             |             |             |             |             |             |             |             |             |             |
| MCW0<br>016 | 1.000       | 0.231       | 0.404       | 0.094       | 1.000       | 0.485       | 1.000       | 0.927       | 0.418       | 0.000       |             |             |             |             |             |             |             |             |             |             |             |             |             |             |             |             |             |             |
| MCW0<br>103 | 0.370       | 1.000       | 0.953       | 0.621       | 0.763       | 1.000       | 0.765       | 0.758       | 0.954       | 0.523       | 0.000       |             |             |             |             |             |             |             |             |             |             |             |             |             |             |             |             |             |
| MCW0<br>295 | 0.149       | 0.730       | 1.000       | 0.113       | 1.000       | 1.000       | 0.261       | 0.720       | 1.000       | 1.000       | 0.162       | 0.000       |             |             |             |             |             |             |             |             |             |             |             |             |             |             |             |             |
| LEI009<br>4 | 0.587       | 0.070       | 0.733       | 0.286       | 0.826       | 0.320       | 0.806       | 0.601       | 0.727       | 0.752       | 0.705       | 0.054       | 0.000       |             |             |             |             |             |             |             |             |             |             |             |             |             |             |             |
| MCW0<br>098 | 0.324       | 0.116       | 0.442       | 1.000       | 1.000       | 0.220       | 1.000       | 1.000       | 0.443       | 0.651       | 1.000       | 1.000       | 0.551       | 0.000       |             |             |             |             |             |             |             |             |             |             |             |             |             |             |
| MCW0<br>078 | 0.542       | 1.000       | 0.155       | 0.508       | 0.773       | 1.000       | 0.066       | 0.120       | 0.153       | 1.000       | 0.816       | 0.384       | 0.622       | 1.000       | 0.000       |             |             |             |             |             |             |             |             |             |             |             |             |             |
| MCW0<br>081 | 1.000       | 1.000       | 1.000       | 1.000       | 1.000       | 0.454       | 1.000       | 0.624       | 1.000       | 1.000       | 0.622       | 1.000       | 0.683       | 1.000       | 1.000       | 0.000       |             |             |             |             |             |             |             |             |             |             |             |             |
| LEI019<br>2 | 1.000       | 0.729       | 1.000       | 0.563       | 0.251       | 1.000       | 1.000       | 0.701       | 1.000       | 1.000       | 1.000       | 1.000       | 0.433       | 0.558       | 0.394       | 1.000       | 0.000       |             |             |             |             |             |             |             |             |             |             |             |
| MCW0<br>014 | 1.000       | 1.000       | 1.000       | 1.000       | 1.000       | 1.000       | 1.000       | 1.000       | 1.000       | 1.000       | 0.394       | 1.000       | 1.000       | 0.743       | 1.000       | 0.107       | 1.000       | 0.000       |             |             |             |             |             |             |             |             |             |             |
| MCW0<br>183 | 1.000       | 1.000       | 1.000       | 0.533       | 0.342       | 1.000       | 1.000       | 1.000       | 1.000       | 1.000       | 0.670       | 1.000       | 1.000       | 1.000       | 1.000       | 1.000       | 1.000       | 1.000       | 0.000       |             |             |             |             |             |             |             |             |             |
| MCW0<br>067 | 0.063       | 0.657       | 1.000       | 0.393       | 1.000       | 1.000       | 0.724       | 0.804       | 1.000       | 0.621       | 0.112       | 0.393       | 0.233       | 0.341       | 1.000       | 0.628       | 1.000       | 0.233       | 0.278       | 0.000       |             |             |             |             |             |             |             |             |
| ADL01<br>12 | 1.000       | 0.734       | 1.000       | 0.114       | 0.273       | 1.000       | 1.000       | 0.711       | 1.000       | 1.000       | 1.000       | 1.000       | 1.000       | 1.000       | 1.000       | 1.000       | 1.000       | 1.000       | 0.103       | 1.000       | 0.000       |             |             |             |             |             |             |             |
| MCW0<br>216 | 1.000       | 0.900       | 0.298       | 0.687       | 1.000       | 1.000       | 1.000       | 0.908       | 0.291       | 1.000       | 0.383       | 0.168       | 0.145       | 1.000       | 0.105       | 1.000       | 1.000       | 1.000       | 1.000       | 0.524       | 1.000       | 0.000       |             |             |             |             |             |             |
| MCW0<br>104 | 1.000       | 1.000       | 1.000       | 0.428       | 0.200       | 1.000       | 1.000       | 1.000       | 1.000       | 1.000       | 1.000       | 1.000       | 1.000       | 1.000       | 1.000       | 1.000       | 1.000       | N/A         | 0.058       | 1.000       | 0.090       | 1.000       | 0.000       |             |             |             |             |             |
| MCW0<br>123 | 1.000       | 1.000       | 1.000       | 1.000       | 1.000       | 1.000       | 1.000       | 0.277       | 1.000       | 1.000       | 0.275       | 0.276       | 1.000       | 1.000       | 0.509       | 1.000       | 1.000       | N/A         | 1.000       | 1.000       | 1.000       | 0.296       | 1.000       | 0.000       |             |             |             |             |
| MCW0<br>330 | 1.000       | 1.000       | 1.000       | 1.000       | 1.000       | 1.000       | 1.000       | 1.000       | 1.000       | 1.000       | 0.430       | 1.000       | 1.000       | 0.784       | 1.000       | 0.124       | 1.000       | 0.022       | 1.000       | 0.189       | 1.000       | 1.000       | N/A         | N/A         | 0.000       |             |             |             |
| MCW0<br>165 | 0.897       | 1.000       | 0.705       | 0.386       | 1.000       | 0.362       | 0.901       | 1.000       | 1.000       | 0.395       | 1.000       | 1.000       | 1.000       | 0.571       | 1.000       | 1.000       | 1.000       | 1.000       | 0.481       | 1.000       | 0.242       | 1.000       | 1.000       | 1.000       | 0.070       | 0.000       |             |             |
| MCW0<br>069 | 1.000       | 0.906       | 1.000       | 1.000       | 0.726       | 0.728       | 0.735       | 0.253       | 1.000       | 0.619       | 0.114       | 1.000       | 0.510       | 1.000       | 0.904       | 0.138       | 1.000       | 0.224       | 1.000       | 0.165       | 1.000       | 0.503       | 1.000       | 0.512       | 0.199       | 1.000       | 0.000       |             |
| ADL02<br>78 | 1.000       | 0.424       | 1.000       | 0.654       | 0.348       | 1.000       | 1.000       | 0.810       | 1.000       | 1.000       | 1.000       | 1.000       | 0.653       | 0.428       | 1.000       | 1.000       | 0.083       | N/A         | 1.000       | 1.000       | 0.184       | 1.000       | 1.000       | 1.000       | N/A         | 1.000       | 1.000       | 0.000       |

**Table S8** Pairwise differentiation of linkage disequilibrium of Fah Luang chicken individuals at Mae Hong Son Livestock Research and Breeding Center (MLRBC) based on 28 microsatellite loci. Numbers indicate *p*-values with 110 permutations. Detailed information on all of the Chee Fah and Fah Luang chicken individuals is presented in Table S1.

| Locus       | MCW0<br>111 | MCW0<br>247 | LEI0<br>234 | LEI0<br>166 | MCW0<br>222 | MCW0<br>037 | ADL0<br>268 | MCW0<br>034 | MCW0<br>206 | MCW0<br>016 | MCW0<br>103 | MCW0<br>295 | LEI0<br>094 | MCW0<br>098 | MCW0<br>078 | MCW0<br>081 | LEI0<br>192 | MCW0<br>014 | MCW0<br>183 | MCW0<br>067 | ADL0<br>112 | MCW0<br>216 | MCW0<br>104 | MCW0<br>123 | MCW0<br>330 | MCW0<br>165 | MCW0<br>069 | ADL0<br>278 |
|-------------|-------------|-------------|-------------|-------------|-------------|-------------|-------------|-------------|-------------|-------------|-------------|-------------|-------------|-------------|-------------|-------------|-------------|-------------|-------------|-------------|-------------|-------------|-------------|-------------|-------------|-------------|-------------|-------------|
| MCW0<br>111 | 0.000       |             |             |             |             |             |             |             |             |             |             |             |             |             |             |             |             |             |             |             |             |             |             |             |             |             |             |             |
| MCW0<br>247 | 0.273       | 0.000       |             |             |             |             |             |             |             |             |             |             |             |             |             |             |             |             |             |             |             |             |             |             |             |             |             |             |
| LEI023<br>4 | 0.303       | 0.180       | 0.000       |             |             |             |             |             |             |             |             |             |             |             |             |             |             |             |             |             |             |             |             |             |             |             |             |             |
| LEI016<br>6 | 0.208       | 0.930       | 1.000       | 0.000       |             |             |             |             |             |             |             |             |             |             |             |             |             |             |             |             |             |             |             |             |             |             |             |             |
| MCW0<br>222 | 0.230       | 0.191       | 0.220       | 0.561       | 0.000       |             |             |             |             |             |             |             |             |             |             |             |             |             |             |             |             |             |             |             |             |             |             |             |
| MCW0<br>037 | 0.478       | 0.257       | 1.000       | 0.800       | 0.435       | 0.000       |             |             |             |             |             |             |             |             |             |             |             |             |             |             |             |             |             |             |             |             |             |             |
| ADL02<br>68 | 0.314       | 0.668       | 1.000       | 0.533       | 0.553       | 0.042       | 0.000       |             |             |             |             |             |             |             |             |             |             |             |             |             |             |             |             |             |             |             |             |             |
| MCW0<br>034 | 0.105       | 0.056       | 1.000       | 0.683       | 0.212       | 0.691       | 0.709       | 0.000       |             |             |             |             |             |             |             |             |             |             |             |             |             |             |             |             |             |             |             |             |
| MCW0<br>206 | 0.807       | 1.000       | 1.000       | 0.449       | 0.912       | 1.000       | 0.450       | 1.000       | 0.000       |             |             |             |             |             |             |             |             |             |             |             |             |             |             |             |             |             |             |             |
| MCW0<br>016 | 0.016       | 0.784       | 0.158       | 0.191       | 0.201       | 0.263       | 0.673       | 0.435       | 0.634       | 0.000       |             |             |             |             |             |             |             |             |             |             |             |             |             |             |             |             |             |             |
| MCW0<br>103 | 0.745       | 0.472       | 0.444       | 0.682       | 1.000       | 0.855       | 0.686       | 0.450       | 1.000       | 1.000       | 0.000       |             |             |             |             |             |             |             |             |             |             |             |             |             |             |             |             |             |
| MCW0<br>295 | 0.134       | 0.255       | 0.768       | 0.883       | 0.379       | 0.003       | 0.067       | 0.227       | 1.000       | 0.060       | 0.828       | 0.000       |             |             |             |             |             |             |             |             |             |             |             |             |             |             |             |             |
| LEI009<br>4 | 0.830       | 1.000       | 1.000       | 0.358       | 0.833       | 0.218       | 0.169       | 1.000       | 1.000       | 0.590       | 0.412       | 0.341       | 0.000       |             |             |             |             |             |             |             |             |             |             |             |             |             |             |             |
| MCW0<br>098 | 0.564       | 0.599       | 0.008       | 1.000       | 1.000       | 0.719       | 0.802       | 1.000       | 0.363       | 0.321       | 0.311       | 0.249       | 0.910       | 0.000       |             |             |             |             |             |             |             |             |             |             |             |             |             |             |
| MCW0<br>078 | 0.227       | 1.000       | 0.810       | 0.549       | 0.377       | 0.596       | 0.550       | 0.236       | 0.912       | 0.199       | 0.675       | 0.376       | 0.300       | 1.000       | 0.000       |             |             |             |             |             |             |             |             |             |             |             |             |             |
| MCW0<br>081 | 1.000       | 0.452       | 1.000       | 0.516       | 0.389       | 0.875       | 0.945       | 1.000       | 0.291       | 0.917       | 0.278       | 1.000       | 1.000       | 1.000       | 0.797       | 0.000       |             |             |             |             |             |             |             |             |             |             |             |             |
| LEI019<br>2 | 0.489       | 0.393       | 1.000       | 0.270       | 0.626       | 1.000       | 1.000       | 1.000       | 1.000       | 1.000       | 0.393       | 1.000       | 1.000       | 1.000       | 1.000       | 1.000       | 0.000       |             |             |             |             |             |             |             |             |             |             |             |
| MCW0<br>014 | 1.000       | 0.844       | 0.798       | 0.966       | 1.000       | 1.000       | 0.372       | 1.000       | 1.000       | 0.835       | 0.596       | 1.000       | 0.582       | 0.781       | 0.735       | 0.928       | 1.000       | 0.000       |             |             |             |             |             |             |             |             |             |             |
| MCW0<br>183 | 1.000       | 1.000       | 0.534       | 1.000       | 0.444       | 0.383       | 1.000       | 1.000       | 1.000       | 0.528       | 0.526       | 0.712       | 1.000       | 0.524       | 1.000       | 0.574       | 1.000       | 0.443       | 0.000       |             |             |             |             |             |             |             |             |             |
| MCW0<br>067 | 0.905       | 1.000       | 1.000       | 0.386       | 0.661       | 0.354       | 0.053       | 1.000       | 0.241       | 0.790       | 1.000       | 0.456       | 0.531       | 0.363       | 0.658       | 0.682       | 1.000       | 0.293       | 1.000       | 0.000       |             |             |             |             |             |             |             |             |
| ADL01<br>12 | 0.418       | 0.860       | 0.031       | 0.471       | 0.395       | 0.514       | 0.793       | 0.870       | 0.626       | 0.031       | 0.438       | 0.119       | 0.924       | 0.039       | 0.386       | 0.286       | 1.000       | 1.000       | 0.279       | 0.158       | 0.000       |             |             |             |             |             |             |             |
| MCW0<br>216 | 0.344       | 0.059       | 0.772       | 0.588       | 0.378       | 1.000       | 1.000       | 0.054       | 1.000       | 0.829       | 1.000       | 1.000       | 1.000       | 0.865       | 1.000       | 0.574       | 0.249       | 0.809       | 0.715       | 1.000       | 0.751       | 0.000       |             |             |             |             |             |             |
| MCW0<br>104 | 0.503       | 1.000       | 0.672       | 0.637       | 0.772       | 0.716       | 0.547       | 0.668       | 1.000       | 0.264       | 0.255       | 0.235       | 0.156       | 0.704       | 0.238       | 0.930       | 1.000       | 0.647       | 1.000       | 0.856       | 0.286       | 0.818       | 0.000       |             |             |             |             |             |
| MCW0<br>123 | 0.047       | 0.236       | 0.812       | 0.025       | 0.385       | 0.267       | 0.421       | 0.779       | 0.485       | 0.248       | 0.530       | 0.465       | 0.639       | 0.273       | 0.364       | 0.661       | 0.293       | 0.916       | 1.000       | 0.505       | 0.398       | 0.716       | 0.829       | 0.000       |             |             |             |             |
| MCW0<br>330 | N/A         | 0.000       |             |             |             |
| MCW0<br>165 | 0.417       | 0.861       | 0.030       | 0.473       | 0.406       | 0.499       | 0.790       | 0.863       | 0.619       | 0.035       | 0.461       | 0.096       | 0.927       | 0.034       | 0.402       | 0.292       | 1.000       | 1.000       | 0.279       | 0.146       | 0.001       | 0.749       | 0.269       | 0.415       | N/A         | 0.000       |             |             |
| MCW0<br>069 | 0.054       | 0.065       | 0.040       | 0.910       | 0.136       | 1.000       | 0.890       | 0.531       | 1.000       | 0.214       | 0.576       | 0.952       | 0.783       | 0.166       | 0.702       | 0.773       | 0.156       | 0.965       | 0.467       | 1.000       | 0.485       | 0.266       | 0.837       | 0.322       | N/A         | 0.446       | 0.000       |             |
| ADL02<br>78 | 0.275       | 0.046       | 0.338       | 0.698       | 0.220       | 0.162       | 0.711       | 1.000       | 1.000       | 0.159       | 0.934       | 0.202       | 0.544       | 0.148       | 0.797       | 0.529       | 1.000       | 0.690       | 0.164       | 0.445       | 0.183       | 0.776       | 1.000       | 0.019       | N/A         | 0.169       | 0.000       | 0.000       |

**Table S9** Genetic diversity of 39 individuals of Chee Fah and Fah Luang chicken breeds based on 28 microsatellite loci. Detailed information on all of the Chee Fah and Fah Luang chicken individuals is presented in Table S1.

| Breeds   | Populations        | Locus   | N  | $N_a^1$ | $AR^2$ | $N_{ea}^3$ | $I^4$ | $H_o^5$ | $H_e^6$ | $PIC^7$ | $F^8$  |
|----------|--------------------|---------|----|---------|--------|------------|-------|---------|---------|---------|--------|
| Chee Fah | CRRBC <sup>1</sup> | MCW0111 | 10 | 6.000   | 5.800  | 4.000      | 1.557 | 0.200   | 0.750   | 0.553   | 0.733  |
|          |                    | MCW0247 | 10 | 4.000   | 3.995  | 3.333      | 1.280 | 0.200   | 0.700   | 0.645   | 0.714  |
|          |                    | LEI0234 | 10 | 7.000   | 6.884  | 5.556      | 1.818 | 0.200   | 0.820   | 0.730   | 0.756  |
|          |                    | LEI0166 | 10 | 4.000   | 3.800  | 2.410      | 1.013 | 0.200   | 0.585   | 0.501   | 0.658  |
|          |                    | MCW0222 | 10 | 7.000   | 6.500  | 3.077      | 1.442 | 0.500   | 0.675   | 0.612   | 0.259  |
|          |                    | MCW0037 | 10 | 3.000   | 2.900  | 2.151      | 0.845 | 0.200   | 0.535   | 0.436   | 0.626  |
|          |                    | ADL0268 | 10 | 7.000   | 6.884  | 5.405      | 1.808 | 0.400   | 0.815   | 0.791   | 0.509  |
|          |                    | MCW0034 | 10 | 7.000   | 6.595  | 3.226      | 1.498 | 0.200   | 0.690   | 0.658   | 0.710  |
|          |                    | MCW0206 | 10 | 4.000   | 4.000  | 3.774      | 1.354 | 0.300   | 0.735   | 0.685   | 0.592  |
|          |                    | MCW0016 | 10 | 5.000   | 4.889  | 3.175      | 1.331 | 0.100   | 0.685   | 0.635   | 0.854  |
|          |                    | MCW0103 | 10 | 2.000   | 2.000  | 1.923      | 0.673 | 0.000   | 0.480   | 0.365   | 1.000  |
|          |                    | MCW0295 | 10 | 7.000   | 6.695  | 4.167      | 1.653 | 0.300   | 0.760   | 0.618   | 0.605  |
|          |                    | LEI0094 | 10 | 4.000   | 3.989  | 2.778      | 1.168 | 0.000   | 0.640   | 0.365   | 1.000  |
|          |                    | MCW0098 | 10 | 2.000   | 1.995  | 1.220      | 0.325 | 0.200   | 0.180   | 0.164   | -0.111 |
|          |                    | MCW0078 | 10 | 6.000   | 5.984  | 5.000      | 1.696 | 0.200   | 0.800   | 0.745   | 0.750  |
|          |                    | MCW0081 | 10 | 6.000   | 5.700  | 3.390      | 1.440 | 0.900   | 0.705   | 0.663   | -0.277 |
|          |                    | LEI0192 | 10 | 6.000   | 5.895  | 4.545      | 1.639 | 0.800   | 0.780   | 0.749   | -0.026 |
|          |                    | MCW0014 | 10 | 5.000   | 4.800  | 3.390      | 1.349 | 0.800   | 0.705   | 0.653   | -0.135 |
|          |                    | MCW0183 | 10 | 4.000   | 3.895  | 2.597      | 1.094 | 0.300   | 0.615   | 0.544   | 0.512  |
|          |                    | MCW0067 | 10 | 4.000   | 3.995  | 2.899      | 1.208 | 1.000   | 0.655   | 0.442   | -0.527 |
|          |                    | ADL0112 | 10 | 8.000   | 7.600  | 5.556      | 1.861 | 0.800   | 0.820   | 0.796   | 0.024  |
|          |                    | MCW0216 | 10 | 7.000   | 6.689  | 3.333      | 1.541 | 0.800   | 0.700   | 0.673   | -0.143 |
|          |                    | MCW0104 | 10 | 9.000   | 8.495  | 5.263      | 1.916 | 1.000   | 0.810   | 0.790   | -0.235 |

| Breeds | Populations        | Locus   | N     | $N_a^1$ | $AR^2$ | $N_{ea}^3$ | $I^4$ | $H_o^5$ | $H_e^6$ | $PIC^7$ | $F^8$  |
|--------|--------------------|---------|-------|---------|--------|------------|-------|---------|---------|---------|--------|
|        |                    | MCW0123 | 10    | 6.000   | 5.795  | 3.846      | 1.527 | 0.800   | 0.740   | 0.703   | -0.081 |
|        |                    | MCW0330 | 9     | 7.000   | 7.000  | 3.375      | 1.561 | 0.444   | 0.704   | 0.679   | 0.368  |
|        |                    | MCW0165 | 10    | 4.000   | 3.900  | 3.175      | 1.224 | 0.700   | 0.685   | 0.623   | -0.022 |
|        |                    | MCW0069 | 10    | 7.000   | 6.600  | 4.082      | 1.612 | 0.400   | 0.755   | 0.719   | 0.470  |
|        |                    | ADL0278 | 10    | 3.000   | 3.000  | 2.062      | 0.886 | 0.400   | 0.515   | 0.460   | 0.223  |
|        |                    | Mean    | 9.964 | 5.393   | 5.224  | 3.525      | 1.369 | 0.441   | 0.680   | 0.607   | 0.350  |
|        |                    | SE      | 0.036 | 0.346   | 1.718  | 0.214      | 0.071 | 0.058   | 0.025   | 0.151   | 0.081  |
|        | MLRBC <sup>2</sup> | MCW0111 | 10    | 4.000   | 3.900  | 2.564      | 1.110 | 0.900   | 0.610   | 0.554   | -0.475 |
|        |                    | MCW0247 | 10    | 3.000   | 3.000  | 2.632      | 1.030 | 1.000   | 0.620   | 0.548   | -0.613 |
|        |                    | LEI0234 | 10    | 7.000   | 6.789  | 5.263      | 1.775 | 1.000   | 0.810   | 0.784   | -0.235 |
|        |                    | LEI0166 | 10    | 4.000   | 3.900  | 2.985      | 1.192 | 0.600   | 0.665   | 0.603   | 0.098  |
|        |                    | MCW0222 | 10    | 4.000   | 3.895  | 2.597      | 1.094 | 1.000   | 0.615   | 0.389   | -0.626 |
|        |                    | MCW0037 | 10    | 3.000   | 3.000  | 2.778      | 1.055 | 0.800   | 0.640   | 0.563   | -0.250 |
|        |                    | ADL0268 | 10    | 4.000   | 4.000  | 2.985      | 1.238 | 0.800   | 0.665   | 0.618   | -0.203 |
|        |                    | MCW0034 | 10    | 5.000   | 4.889  | 3.175      | 1.331 | 0.500   | 0.685   | 0.635   | 0.270  |
|        |                    | MCW0206 | 10    | 4.000   | 4.000  | 3.704      | 1.345 | 1.000   | 0.730   | 0.680   | -0.370 |
|        |                    | MCW0016 | 10    | 4.000   | 3.995  | 3.077      | 1.235 | 1.000   | 0.675   | 0.619   | -0.481 |
|        |                    | MCW0103 | 10    | 3.000   | 2.995  | 2.381      | 0.943 | 1.000   | 0.580   | 0.492   | -0.724 |
|        |                    | MCW0295 | 10    | 3.000   | 2.800  | 1.227      | 0.394 | 0.200   | 0.185   | 0.177   | -0.081 |
|        |                    | LEI0094 | 10    | 5.000   | 4.895  | 3.636      | 1.415 | 0.400   | 0.725   | 0.681   | 0.448  |
|        |                    | MCW0098 | 10    | 2.000   | 2.000  | 1.600      | 0.562 | 0.500   | 0.375   | 0.305   | -0.333 |
|        |                    | MCW0078 | 10    | 1.000   | 1.000  | 1.000      | 0.000 | 0.000   | 0.000   | 0.000   | #N/A   |
|        |                    | MCW0081 | 10    | 2.000   | 2.000  | 1.471      | 0.500 | 0.400   | 0.320   | 0.269   | -0.250 |
|        |                    | LEI0192 | 9     | 5.000   | 5.000  | 3.057      | 1.330 | 1.000   | 0.673   | 0.631   | -0.486 |
|        |                    | MCW0014 | 10    | 5.000   | 4.800  | 3.125      | 1.305 | 1.000   | 0.680   | 0.627   | -0.471 |
|        |                    | MCW0183 | 10    | 3.000   | 2.989  | 1.515      | 0.639 | 0.200   | 0.340   | 0.314   | 0.412  |

| Breeds    | Populations        | Locus   | N     | $N_a^1$ | $AR^2$ | $N_{ea}^3$ | $I^4$ | $H_o^5$ | $H_e^6$ | $PIC^7$ | $F^8$  |
|-----------|--------------------|---------|-------|---------|--------|------------|-------|---------|---------|---------|--------|
|           |                    | MCW0067 | 10    | 4.000   | 3.995  | 2.667      | 1.166 | 0.800   | 0.625   | 0.578   | -0.280 |
|           |                    | ADL0112 | 10    | 4.000   | 3.900  | 2.817      | 1.165 | 1.000   | 0.645   | 0.587   | -0.550 |
|           |                    | MCW0216 | 10    | 2.000   | 2.000  | 1.724      | 0.611 | 0.000   | 0.420   | 0.332   | 1.000  |
|           |                    | MCW0104 | 10    | 4.000   | 3.795  | 1.527      | 0.708 | 0.200   | 0.345   | 0.326   | 0.420  |
|           |                    | MCW0123 | 10    | 4.000   | 3.995  | 2.667      | 1.166 | 0.900   | 0.625   | 0.578   | -0.440 |
|           |                    | MCW0330 | 10    | 3.000   | 2.900  | 2.062      | 0.824 | 0.800   | 0.515   | 0.424   | -0.553 |
|           |                    | MCW0165 | 10    | 5.000   | 4.800  | 2.985      | 1.290 | 1.000   | 0.665   | 0.618   | -0.504 |
|           |                    | MCW0069 | 10    | 4.000   | 3.800  | 1.869      | 0.871 | 0.500   | 0.465   | 0.420   | -0.075 |
|           |                    | ADL0278 | 10    | 4.000   | 3.895  | 1.905      | 0.914 | 0.600   | 0.475   | 0.440   | -0.263 |
|           |                    | Mean    | 9.964 | 3.750   | 3.676  | 3.030      | 1.188 | 0.562   | 0.614   | 0.493   | 0.076  |
|           |                    | SE      | 0.036 | 0.228   | 1.163  | 0.151      | 0.055 | 0.046   | 0.023   | 0.177   | 0.067  |
|           |                    |         |       |         |        |            |       |         |         |         |        |
|           |                    |         |       |         |        |            |       |         |         |         |        |
| Fah Luang | CRRBC <sup>1</sup> | MCW0111 | 9     | 5.000   | 4.773  | 4.263      | 1.505 | 0.222   | 0.765   | 0.726   | 0.710  |
|           |                    | MCW0247 | 9     | 4.000   | 3.516  | 1.604      | 0.761 | 0.333   | 0.377   | 0.354   | 0.115  |
|           |                    | LEI0234 | 9     | 6.000   | 5.511  | 4.050      | 1.565 | 0.333   | 0.753   | 0.718   | 0.557  |
|           |                    | LEI0166 | 9     | 3.000   | 2.778  | 2.219      | 0.868 | 0.111   | 0.549   | 0.448   | 0.798  |
|           |                    | MCW0222 | 9     | 4.000   | 3.956  | 3.176      | 1.259 | 0.556   | 0.685   | 0.607   | 0.189  |
|           |                    | MCW0037 | 9     | 4.000   | 3.777  | 2.842      | 1.176 | 0.333   | 0.648   | 0.592   | 0.486  |
|           |                    | ADL0268 | 9     | 4.000   | 3.994  | 3.600      | 1.334 | 0.111   | 0.722   | 0.674   | 0.846  |
|           |                    | MCW0034 | 9     | 6.000   | 5.072  | 2.132      | 1.157 | 0.222   | 0.531   | 0.368   | 0.581  |
|           |                    | MCW0206 | 9     | 6.000   | 5.511  | 4.263      | 1.586 | 0.222   | 0.765   | 0.762   | 0.710  |
|           |                    | MCW0016 | 9     | 6.000   | 5.333  | 4.050      | 1.538 | 0.333   | 0.753   | 0.550   | 0.557  |
|           |                    | MCW0103 | 9     | 2.000   | 2.000  | 1.528      | 0.530 | 0.222   | 0.346   | 0.286   | 0.357  |
|           |                    | MCW0295 | 9     | 5.000   | 4.768  | 4.050      | 1.480 | 0.556   | 0.753   | 0.712   | 0.262  |
|           |                    | LEI0094 | 9     | 4.000   | 3.922  | 3.000      | 1.215 | 0.000   | 0.667   | 0.372   | 1.000  |
|           |                    | MCW0098 | 9     | 2.000   | 1.778  | 1.117      | 0.215 | 0.111   | 0.105   | 0.099   | -0.059 |
|           |                    | MCW0078 | 9     | 5.000   | 4.777  | 4.378      | 1.519 | 0.556   | 0.772   | 0.733   | 0.280  |

| Breeds             | Populations | Locus   | N     | $N_a^1$ | $AR^2$ | $N_{ea}^3$ | $I^4$ | $H_o^5$ | $H_e^6$ | $PIC^7$ | $F^8$  |
|--------------------|-------------|---------|-------|---------|--------|------------|-------|---------|---------|---------|--------|
|                    |             | MCW0081 | 9     | 4.000   | 3.777  | 2.842      | 1.176 | 0.778   | 0.648   | 0.592   | -0.200 |
|                    |             | LEI0192 | 9     | 8.000   | 7.062  | 5.226      | 1.850 | 0.667   | 0.809   | 0.786   | 0.176  |
|                    |             | MCW0014 | 8     | 7.000   | 6.725  | 5.333      | 1.804 | 0.250   | 0.813   | 0.748   | 0.692  |
|                    |             | MCW0183 | 8     | 6.000   | 5.742  | 4.571      | 1.630 | 0.625   | 0.781   | 0.748   | 0.200  |
|                    |             | MCW0067 | 9     | 5.000   | 4.333  | 2.314      | 1.117 | 0.556   | 0.568   | 0.450   | 0.022  |
|                    |             | ADL0112 | 9     | 8.000   | 7.032  | 5.063      | 1.831 | 0.556   | 0.802   | 0.779   | 0.308  |
|                    |             | MCW0216 | 9     | 5.000   | 4.738  | 3.951      | 1.461 | 0.667   | 0.747   | 0.704   | 0.107  |
|                    |             | MCW0104 | 7     | 8.000   | 8.000  | 5.765      | 1.909 | 0.714   | 0.827   | 0.806   | 0.136  |
|                    |             | MCW0123 | 7     | 4.000   | 4.000  | 2.130      | 0.991 | 0.429   | 0.531   | 0.483   | 0.192  |
|                    |             | MCW0330 | 9     | 8.000   | 7.249  | 6.231      | 1.937 | 0.778   | 0.840   | 0.820   | 0.074  |
|                    |             | MCW0165 | 9     | 6.000   | 5.333  | 4.050      | 1.538 | 0.778   | 0.753   | 0.637   | -0.033 |
|                    |             | MCW0069 | 9     | 5.000   | 4.951  | 4.500      | 1.553 | 0.889   | 0.778   | 0.742   | -0.143 |
|                    |             | ADL0278 | 7     | 3.000   | 3.000  | 2.800      | 1.061 | 0.571   | 0.643   | 0.567   | 0.111  |
|                    |             | Mean    | 8.714 | 4.982   | 4.765  | 3.324      | 1.275 | 0.558   | 0.643   | 0.602   | 0.115  |
|                    |             | SE      | 0.124 | 0.226   | 1.535  | 0.177      | 0.054 | 0.040   | 0.022   | 0.183   | 0.056  |
| MLRBC <sup>2</sup> |             | MCW0111 | 10    | 4.000   | 3.795  | 1.527      | 0.708 | 0.300   | 0.345   | 0.326   | 0.130  |
|                    |             | MCW0247 | 10    | 4.000   | 3.900  | 2.857      | 1.161 | 1.000   | 0.650   | 0.584   | -0.538 |
|                    |             | LEI0234 | 10    | 7.000   | 6.789  | 4.348      | 1.696 | 1.000   | 0.770   | 0.744   | -0.299 |
|                    |             | LEI0166 | 10    | 4.000   | 3.800  | 2.326      | 0.996 | 0.700   | 0.570   | 0.492   | -0.228 |
|                    |             | MCW0222 | 10    | 4.000   | 3.800  | 2.410      | 1.013 | 1.000   | 0.585   | 0.347   | -0.709 |
|                    |             | MCW0037 | 10    | 3.000   | 3.000  | 2.597      | 1.010 | 0.400   | 0.615   | 0.534   | 0.350  |
|                    |             | ADL0268 | 10    | 4.000   | 3.800  | 1.869      | 0.871 | 0.400   | 0.465   | 0.420   | 0.140  |
|                    |             | MCW0034 | 10    | 5.000   | 4.989  | 3.774      | 1.458 | 0.200   | 0.735   | 0.695   | 0.728  |
|                    |             | MCW0206 | 10    | 7.000   | 6.789  | 5.263      | 1.775 | 0.900   | 0.810   | 0.784   | -0.111 |
|                    |             | MCW0016 | 10    | 4.000   | 3.900  | 2.857      | 1.161 | 1.000   | 0.650   | 0.584   | -0.538 |
|                    |             | MCW0103 | 10    | 4.000   | 3.900  | 2.985      | 1.192 | 1.000   | 0.665   | 0.603   | -0.504 |

| Breeds | Populations | Locus   | N     | $N_a$ <sup>1</sup> | $AR$ <sup>2</sup> | $N_{ea}$ <sup>3</sup> | $I$ <sup>4</sup> | $H_o$ <sup>5</sup> | $H_e$ <sup>6</sup> | $PIC$ <sup>7</sup> | $F$ <sup>8</sup> |
|--------|-------------|---------|-------|--------------------|-------------------|-----------------------|------------------|--------------------|--------------------|--------------------|------------------|
|        |             | MCW0295 | 10    | 4.000              | 3.800             | 1.869                 | 0.871            | 0.600              | 0.465              | 0.420              | -0.290           |
|        |             | LEI0094 | 9     | 6.000              | 6.000             | 2.793                 | 1.351            | 0.444              | 0.642              | 0.610              | 0.308            |
|        |             | MCW0098 | 10    | 4.000              | 3.995             | 2.899                 | 1.208            | 0.500              | 0.655              | 0.603              | 0.237            |
|        |             | MCW0078 | 10    | 3.000              | 2.800             | 1.227                 | 0.394            | 0.200              | 0.185              | 0.177              | -0.081           |
|        |             | MCW0081 | 10    | 3.000              | 3.000             | 2.410                 | 0.975            | 0.600              | 0.585              | 0.513              | -0.026           |
|        |             | LEI0192 | 10    | 7.000              | 6.789             | 5.000                 | 1.752            | 0.900              | 0.800              | 0.773              | -0.125           |
|        |             | MCW0014 | 9     | 5.000              | 5.000             | 3.240                 | 1.336            | 1.000              | 0.691              | 0.642              | -0.446           |
|        |             | MCW0183 | 10    | 2.000              | 2.000             | 1.600                 | 0.562            | 0.500              | 0.375              | 0.305              | -0.333           |
|        |             | MCW0067 | 10    | 5.000              | 4.900             | 4.255                 | 1.501            | 0.900              | 0.765              | 0.713              | -0.176           |
|        |             | ADL0112 | 10    | 5.000              | 4.795             | 2.817                 | 1.238            | 1.000              | 0.645              | 0.590              | -0.550           |
|        |             | MCW0216 | 10    | 3.000              | 2.995             | 2.410                 | 0.949            | 0.100              | 0.585              | 0.495              | 0.829            |
|        |             | MCW0104 | 10    | 8.000              | 7.584             | 3.448                 | 1.636            | 0.200              | 0.710              | 0.689              | 0.718            |
|        |             | MCW0123 | 10    | 4.000              | 3.800             | 2.198                 | 0.967            | 0.700              | 0.545              | 0.476              | -0.284           |
|        |             | MCW0330 | 10    | 9.000              | 8.684             | 6.897                 | 2.056            | 0.600              | 0.855              | 0.839              | 0.298            |
|        |             | MCW0165 | 10    | 5.000              | 4.795             | 2.817                 | 1.238            | 1.000              | 0.645              | 0.590              | -0.550           |
|        |             | MCW0069 | 10    | 6.000              | 5.595             | 1.961                 | 1.079            | 0.600              | 0.490              | 0.470              | -0.224           |
|        |             | ADL0278 | 10    | 7.000              | 6.695             | 4.444                 | 1.678            | 1.000              | 0.775              | 0.744              | -0.290           |
|        |             | Mean    | 9.929 | 4.857              | 4.703             | 3.039                 | 1.208            | 0.669              | 0.617              | 0.563              | -0.092           |
|        |             | SE      | 0.050 | 0.320              | 1.619             | 0.241                 | 0.073            | 0.058              | 0.029              | 0.160              | 0.078            |

<sup>1</sup>Number of alleles ( $N_a$ ); <sup>2</sup>allelic richness ( $AR$ ); <sup>3</sup>number of effective alleles ( $N_{ea}$ ); <sup>4</sup>Shannon's information index ( $I$ ); <sup>5</sup>observed heterozygosity ( $H_o$ ); <sup>6</sup>expected heterozygosity ( $H_e$ ); <sup>7</sup>polymorphic information content ( $PIC$ ); <sup>8</sup>fixation index ( $F$ )

<sup>1</sup>CRRBC = Chiang Rai Livestock Research and Breeding Center, Chiang Rai

<sup>2</sup>MLRBC = Mae Hong Son Livestock Research and Breeding Center, Mae Hong Son

**Table S10** Comparison of genetic diversity parameters between Chee Fah and Fah Luang chickens populations based on 28 microsatellite loci. Detailed information on all of the Chee Fah and Fah Luang chicken individuals is presented in Table S1.

| Observed                 | Breeds    | Population 1       | Population 2       | df      | SE     | t-test | p-value  |
|--------------------------|-----------|--------------------|--------------------|---------|--------|--------|----------|
| heterozygosity ( $H_o$ ) | Chee Fah  | CRRBC <sup>1</sup> | MLRBC <sup>2</sup> | -0.241  | 0.027  | -8.824 | $p<0.01$ |
|                          | Fah Luang | CRRBC <sup>1</sup> | MLRBC <sup>2</sup> | -0.0223 | -0.002 | -9.328 | $p<0.01$ |
| heterozygosity ( $H_e$ ) | Chee Fah  | CRRBC <sup>1</sup> | MLRBC <sup>2</sup> | 0.131   | 0.013  | 9.631  | $p<0.01$ |
|                          | Fah Luang | CRRBC <sup>1</sup> | MLRBC <sup>2</sup> | 0.052   | 0.0141 | 3.697  | $p<0.01$ |

$H_o$  = Observed heterozygosity,  $H_e$  = Expected heterozygosity

<sup>1</sup>CRRBC = Chiang Rai Livestock Research and Breeding Center, Chiang Rai

<sup>2</sup>MLRBC = Mae Hong Son Livestock Research and Breeding Center, Mae Hong Son



**Table S11** Observed and expected heterozygosity of Chee Fah and Fah Luang chickens based on 28 microsatellite loci and genetic bottlenecks for all individuals. Data were calculated using Bottleneck version 1.2.02 (Piry et al., 1999). Detailed information on all of the Chee Fah and Fah Luang chicken individuals is presented in Table S1.

| Breeds    | Locality           | $H_o$       | $H_e$       | $p$ -value |
|-----------|--------------------|-------------|-------------|------------|
| Chee Fah  | CRRBC <sup>1</sup> | 0.441±0.058 | 0.680±0.025 | $p < 0.05$ |
|           | MLRBC <sup>2</sup> | 0.682±0.064 | 0.549±0.035 | $p < 0.05$ |
| Fah Luang | CRRBC <sup>1</sup> | 0.446±0.046 | 0.669±0.032 | $p < 0.05$ |
|           | MLRBC <sup>2</sup> | 0.669±0.058 | 0.617±0.029 | $p < 0.05$ |

$H_o$  = Observed heterozygosity,  $H_e$  = Expected heterozygosity

<sup>1</sup>CRRBC = Chiang Rai Livestock Research and Breeding Center, Chiang Rai

<sup>2</sup>MLRBC = Mae Hong Son Livestock Research and Breeding Center, Mae Hong Son

1. Piry, S.; Luikart, G.; Cornuet, J.M. BOTTLENECK: a program for detecting recent effective population size reductions from allele data frequencies. *J. Hered.* **1999**, *90*, 502–503. doi: 10.1093/jhered/90.4.502

**Table S12** Inbreeding coefficients and relatedness of Chee Fah and Fah Luang chicken breeds at the Chiang Rai Livestock Research and Breeding Center (CRRBC, Chiang Rai) and Mae Hong Son Livestock Research and Breeding Center (MLRBC, Mae Hong Son). Estimates were calculated using COANCESTRY version 1.0.1.9 (Wang, 2011) and GenAlEx version 6.5 (Peakall and Smouse, 2012). Detailed information on all of the Chee Fah and Fah Luang chicken individuals is presented in Table S1.

| Breeds    | Population         | N <sup>1</sup> | $F_{IS}$ <sup>2</sup> | Relatedness ( $r$ ) |
|-----------|--------------------|----------------|-----------------------|---------------------|
| Chee Fah  | CRRBC <sup>1</sup> | 10             | 0.352                 | -0.068              |
|           | MLRBC <sup>2</sup> | 10             | -0.242                | -0.047              |
| Fah Luang | CRRBC <sup>1</sup> | 9              | 0.334                 | -0.078              |
|           | MLRBC <sup>2</sup> | 10             | -0.085                | -0.055              |

<sup>1</sup>Sample size (N); <sup>2</sup>inbreeding coefficient ( $F_{IS}$ )

<sup>1</sup>CRRBC = Chiang Rai Livestock Research and Breeding Center, Chiang Rai

<sup>2</sup>MLRBC = Mae Hong Son Livestock Research and Breeding Center, Mae Hong Son

1. Peakall, R. Smouse, P.E. GenAlEx 6.5: genetic analysis in Excel. Population genetic software for teaching and research—an update. *Bioinformatics* **2012**, *28*, 2537–2539. doi: 0.1093/bioinformatics/bts460
2. Wang, J. COANCESTRY: a program for simulating, estimating and analysing relatedness and inbreeding coefficients. *Mol. Ecol. Resour.* 2011, *11*, 141–145. doi: 10.1111/j.1755-0998.2010.02885.x

**Table S13** Pairwise genetic differentiation ( $F_{ST}$ ), pairwise  $F_{ST}^{ENA}$  values with ENA correction for null alleles and  $R_{ST}$  values using FSTAT version 2.9.3 (Goudet, 1995) of Chee Fah and Fah Luang chickens between populations based on 28 microsatellite loci. Numbers indicate  $p$ -values, with 110 permutations. Detailed information on all of the Chee Fah and Fah Luang chicken individuals is presented in Table S1.

| Breeds    | Population 1       | Population 2       | $F_{ST}$ | $F_{ST}^{ENA}$ | $R_{ST}$ |
|-----------|--------------------|--------------------|----------|----------------|----------|
| Chee Fah  | CRRBC <sup>1</sup> | MLRBC <sup>2</sup> | 0.112*   | 0.219          | 0.3737   |
| Fah Luang | CRRBC <sup>1</sup> | MLRBC <sup>2</sup> | 0.128*   | 0.195          | 0.5232   |

\* $p$ -value < 0.05

<sup>1</sup>CRRBC = Chiang Rai Livestock Research and Breeding Center, Chiang Rai

<sup>2</sup>MLRBC = Mae Hong Son Livestock Research and Breeding Center, Mae Hong Son

1. Goudet, J. FSTAT (version 1.2): a computer program to calculate F-statistics. *J. Hered.* **1995**, 86, 485–486. doi: 10.1093/oxfordjournals.jhered.a111627

**Table S14** Pairwise genetic relatedness ( $r$ ) for Chee Fah and Fah Luang Chickens in Chiang Rai and Mae Hong Son Livestock Research and Breeding Center (CRRBC) and Mae Hong Son Livestock Research and Breeding Center (MLRBC) populations. Detailed information on all of the Chee Fah and Fah Luang chicken individuals is presented in Table S1

| Chee Fah Chicken |            |        |            |            |        | Fah Luang Chicken |            |        |            |            |        |
|------------------|------------|--------|------------|------------|--------|-------------------|------------|--------|------------|------------|--------|
| CRRBC            |            |        | MLRBC      |            |        | CRRBC             |            |        | MLRBC      |            |        |
| Specimen 1       | Specimen 2 | $r$    | Specimen 1 | Specimen 2 | $r$    | Specimen 1        | Specimen 2 | $r$    | Specimen 1 | Specimen 2 | $r$    |
| CF1              | CF2        | -0.032 | CFM1       | CFM2       | -0.122 | FL1               | FL2        | -0.003 | FLM1       | FLM2       | 0.006  |
| CF1              | CF3        | -0.037 | CFM1       | CFM3       | -0.050 | FL1               | FL3        | -0.067 | FLM1       | FLM3       | 0.016  |
| CF2              | CF3        | -0.013 | CFM2       | CFM3       | -0.046 | FL2               | FL3        | -0.094 | FLM2       | FLM3       | -0.014 |
| CF1              | CF4        | -0.144 | CFM1       | CFM4       | -0.112 | FL1               | FL5        | -0.143 | FLM1       | FLM4       | -0.079 |
| CF2              | CF4        | -0.051 | CFM2       | CFM4       | 0.049  | FL2               | FL5        | -0.138 | FLM2       | FLM4       | -0.042 |
| CF3              | CF4        | -0.019 | CFM3       | CFM4       | 0.061  | FL3               | FL5        | -0.078 | FLM3       | FLM4       | -0.036 |
| CF1              | CF5        | -0.060 | CFM1       | CFM5       | 0.078  | FL1               | FL6        | -0.172 | FLM1       | FLM5       | -0.010 |
| CF2              | CF5        | -0.066 | CFM2       | CFM5       | -0.122 | FL2               | FL6        | -0.052 | FLM2       | FLM5       | -0.017 |
| CF3              | CF5        | -0.019 | CFM3       | CFM5       | 0.039  | FL3               | FL6        | -0.039 | FLM3       | FLM5       | -0.003 |
| CF4              | CF5        | 0.035  | CFM4       | CFM5       | -0.084 | FL5               | FL6        | 0.011  | FLM4       | FLM5       | -0.064 |
| CF1              | CF6        | -0.133 | CFM1       | CFM6       | -0.140 | FL1               | FL7        | -0.142 | FLM1       | FLM6       | -0.012 |
| CF2              | CF6        | -0.093 | CFM2       | CFM6       | 0.046  | FL2               | FL7        | -0.040 | FLM2       | FLM6       | 0.001  |
| CF3              | CF6        | -0.109 | CFM3       | CFM6       | -0.070 | FL3               | FL7        | -0.103 | FLM3       | FLM6       | -0.011 |
| CF4              | CF6        | -0.023 | CFM4       | CFM6       | -0.074 | FL5               | FL7        | -0.080 | FLM4       | FLM6       | -0.034 |
| CF5              | CF6        | -0.007 | CFM5       | CFM6       | -0.116 | FL6               | FL7        | -0.040 | FLM5       | FLM6       | -0.037 |
| CF1              | CF7        | -0.099 | CFM1       | CFM7       | -0.048 | FL1               | FL8        | -0.008 | FLM1       | FLM7       | -0.098 |
| CF2              | CF7        | -0.088 | CFM2       | CFM7       | -0.016 | FL2               | FL8        | -0.154 | FLM2       | FLM7       | -0.136 |
| CF3              | CF7        | -0.017 | CFM3       | CFM7       | -0.079 | FL3               | FL8        | -0.019 | FLM3       | FLM7       | -0.087 |
| CF4              | CF7        | -0.070 | CFM4       | CFM7       | -0.066 | FL5               | FL8        | -0.067 | FLM4       | FLM7       | -0.009 |
| CF5              | CF7        | -0.112 | CFM5       | CFM7       | -0.063 | FL6               | FL8        | -0.127 | FLM5       | FLM7       | -0.044 |
| CF6              | CF7        | -0.113 | CFM6       | CFM7       | -0.062 | FL7               | FL8        | -0.081 | FLM6       | FLM7       | -0.077 |
| CF1              | CF8        | -0.015 | CFM1       | CFM8       | -0.024 | FL1               | FL9        | -0.073 | FLM1       | FLM8       | -0.099 |
| CF2              | CF8        | -0.066 | CFM2       | CFM8       | -0.050 | FL2               | FL9        | -0.121 | FLM2       | FLM8       | -0.107 |
| CF3              | CF8        | -0.053 | CFM3       | CFM8       | -0.081 | FL3               | FL9        | 0.001  | FLM3       | FLM8       | -0.128 |
| CF4              | CF8        | -0.110 | CFM4       | CFM8       | -0.056 | FL5               | FL9        | -0.118 | FLM4       | FLM8       | -0.080 |
| CF5              | CF8        | -0.110 | CFM5       | CFM8       | -0.040 | FL6               | FL9        | -0.128 | FLM5       | FLM8       | -0.070 |
| CF6              | CF8        | -0.062 | CFM6       | CFM8       | -0.133 | FL7               | FL9        | -0.042 | FLM6       | FLM8       | -0.134 |
| CF7              | CF8        | -0.009 | CFM7       | CFM8       | 0.103  | FL8               | FL9        | -0.072 | FLM7       | FLM8       | -0.128 |
| CF1              | CF9        | -0.018 | CFM1       | CFM9       | 0.000  | FL1               | FL10       | -0.047 | FLM1       | FLM9       | -0.098 |
| CF2              | CF9        | -0.116 | CFM2       | CFM9       | 0.055  | FL2               | FL10       | -0.119 | FLM2       | FLM9       | -0.067 |
| CF3              | CF9        | -0.092 | CFM3       | CFM9       | -0.061 | FL3               | FL10       | -0.053 | FLM3       | FLM9       | -0.067 |

| Chee Fah Chicken |            |          |            |            |          | Fah Luang Chicken |            |          |            |            |          |
|------------------|------------|----------|------------|------------|----------|-------------------|------------|----------|------------|------------|----------|
| CRRBC            |            |          | MLRBC      |            |          | CRRBC             |            |          | MLRBC      |            |          |
| Specimen 1       | Specimen 2 | <i>r</i> | Specimen 1 | Specimen 2 | <i>r</i> | Specimen 1        | Specimen 2 | <i>r</i> | Specimen 1 | Specimen 2 | <i>r</i> |
| CF4              | CF9        | -0.077   | CFM4       | CFM9       | 0.024    | FL5               | FL10       | -0.147   | FLM4       | FLM9       | 0.012    |
| CF5              | CF9        | -0.098   | CFM5       | CFM9       | -0.076   | FL6               | FL10       | -0.095   | FLM5       | FLM9       | -0.087   |
| CF6              | CF9        | -0.087   | CFM6       | CFM9       | -0.030   | FL7               | FL10       | -0.029   | FLM6       | FLM9       | -0.043   |
| CF7              | CF9        | -0.123   | CFM7       | CFM9       | -0.075   | FL8               | FL10       | -0.100   | FLM7       | FLM9       | 0.011    |
| CF8              | CF9        | -0.017   | CFM8       | CFM9       | -0.050   | FL9               | FL10       | -0.016   | FLM8       | FLM9       | -0.107   |
| CF1              | CF10       | -0.049   | CFM1       | CFM10      | 0.026    | -                 | -          | -        | FLM1       | FLM10      | -0.041   |
| CF2              | CF10       | -0.082   | CFM2       | CFM10      | -0.140   | -                 | -          | -        | FLM2       | FLM10      | -0.083   |
| CF3              | CF10       | -0.067   | CFM3       | CFM10      | -0.084   | -                 | -          | -        | FLM3       | FLM10      | 0.003    |
| CF4              | CF10       | -0.123   | CFM4       | CFM10      | -0.080   | -                 | -          | -        | FLM4       | FLM10      | -0.079   |
| CF5              | CF10       | -0.123   | CFM5       | CFM10      | -0.070   | -                 | -          | -        | FLM5       | FLM10      | -0.067   |
| CF6              | CF10       | -0.113   | CFM6       | CFM10      | -0.021   | -                 | -          | -        | FLM6       | FLM10      | -0.048   |
| CF7              | CF10       | -0.006   | CFM7       | CFM10      | -0.080   | -                 | -          | -        | FLM7       | FLM10      | 0.024    |
| CF8              | CF10       | -0.080   | CFM8       | CFM10      | -0.127   | -                 | -          | -        | FLM8       | FLM10      | -0.124   |
| CF9              | CF10       | -0.110   | CFM9       | CFM10      | -0.054   | -                 | -          | -        | FLM9       | FLM10      | -0.071   |

**Table S15** Inbreeding coefficients ( $F_{IS}$ ) of 39 individuals of Chee Fah and Fah Luang chicken individuals in Chiang Rai Livestock Research and Breeding Center (CRRBC) and Mae Hong Son Livestock Research and Breeding Center (MLRBC) populations. Detailed information on all of the Chee Fah and Fah Luang chicken individuals is presented in Table S1

| Chee Fah Chicken |          |          |          | Fah Luang Chicken |          |          |          |
|------------------|----------|----------|----------|-------------------|----------|----------|----------|
| CRRBC            |          | MLRBC    |          | CRRBC             |          | MLRBC    |          |
| Specimen         | $F_{IS}$ | Specimen | $F_{IS}$ | Specimen          | $F_{IS}$ | Specimen | $F_{IS}$ |
| CF1              | 0.164    | CFM1     | -0.3023  | FL1               | 0.0102   | FLM1     | -0.1219  |
| CF2              | 0.121    | CFM2     | -0.268   | FL2               | 0.1256   | FLM2     | -0.2085  |
| CF3              | -0.305   | CFM3     | -0.2623  | FL3               | 0.023    | FLM3     | -0.1835  |
| CF4              | -0.050   | CFM4     | -0.1928  | FL5               | 0.1226   | FLM4     | -0.1983  |
| CF5              | -0.022   | CFM5     | -0.3397  | FL6               | 0.0077   | FLM5     | -0.1082  |
| CF6              | -0.002   | CFFM1    | -0.2646  | FL7               | 0.0856   | FLFM1    | -0.2078  |
| CF7              | 0.053    | CFFM2    | -0.3013  | FL8               | -0.0431  | FLFM2    | -0.1776  |
| CF8              | 0.099    | CFFM3    | -0.2881  | FL9               | 0.001    | FLFM3    | -0.1909  |
| CF9              | -0.002   | CFFM4    | -0.3016  | FL10              | -0.0914  | FLFM4    | -0.1076  |
| CF10             | 0.019    | CFFM5    | -0.2764  | -                 | -        | FLFM5    | -0.1219  |

**Table S16** Molecular variance (AMOVA) results for Chee Fah and Fah Luang chickens based on 28 microsatellite loci using Arlequin version 3.5.2.2 (Excoffier and Lischer 2010). Detailed information on all of the Chee Fah and Fah Luang chicken individuals is presented in Table S1.

| Breeds           | Source of variation | df | Sum of squares | Variance components | Percentage of variation |
|------------------|---------------------|----|----------------|---------------------|-------------------------|
| <b>Chee Fah</b>  | Among populations   | 1  | 127.100        | 127.100             | 34%                     |
|                  | Within populations  | 18 | 377.200        | 20.956              | 66%                     |
|                  | Total               | 19 | 504.300        |                     | 100%                    |
| <b>Fah Luang</b> | Among populations   | 1  | 57.261         | 57.261              | 20%                     |
|                  | Among individuals   | 17 | 198.133        | 11.655              | 16%                     |
|                  | Within individuals  | 19 | 147.000        | 7.737               | 64%                     |
|                  | Total               | 37 | 402.395        |                     | 100%                    |

1. Excoffier, L.; Lischer, H.E. Arlequin suite ver 3.5: a new series of programs to perform population genetics analyses under Linux and Windows. *Mol. Ecol. Resour.* **2010**, *10*, 564–567. doi: 10.1111/j.1755-0998.2010.02847.x
